# Supplementary material for: Gut Microbial Alterations in Diarrheal Baer's Pochards (Aythya baeri)
Source: PubMed Central journal article supplement (PMC8551490; doi:10.3389/fvets.2021.756486), 2021-10-14
Supplement: Table_1.pdf [file Table_1.pdf]

Supplementary Table 1 Significant alterations in the gut fungal compositions at the genus levels.

| <b>Genus</b>             | <b>Mean<br/>(C)</b> | <b>Variance<br/>(C)</b> | <b>Mean<br/>(D)</b> | <b>Variance<br/>(D)</b> | <b>p value</b> |
|--------------------------|---------------------|-------------------------|---------------------|-------------------------|----------------|
| <i>Achroiostachys</i>    | 0.00E+00            | 0.00E+00                | 1.36E-04            | 1.49E-07                | 0.001          |
| <i>Armillaria</i>        | 0.00E+00            | 0.00E+00                | 2.40E-04            | 1.96E-07                | 0.001          |
| <i>Bimuria</i>           | 0.00E+00            | 0.00E+00                | 3.54E-04            | 9.90E-07                | 0.001          |
| <i>Clathrosphaerina</i>  | 0.00E+00            | 0.00E+00                | 1.19E-04            | 1.14E-07                | 0.001          |
| <i>Clavaria</i>          | 0.00E+00            | 0.00E+00                | 2.66E-04            | 5.64E-07                | 0.001          |
| <i>Claviceps</i>         | 0.00E+00            | 0.00E+00                | 1.70E-04            | 1.20E-07                | 0.001          |
| <i>Clitopilus</i>        | 0.00E+00            | 0.00E+00                | 1.89E-04            | 2.85E-07                | 0.001          |
| <i>Diaporthe</i>         | 0.00E+00            | 0.00E+00                | 1.09E-04            | 6.42E-08                | 0.001          |
| <i>Kockovaella</i>       | 0.00E+00            | 0.00E+00                | 1.20E-04            | 5.36E-08                | 0.001          |
| <i>Lachancea</i>         | 0.00E+00            | 0.00E+00                | 8.84E-04            | 5.92E-06                | 0.001          |
| <i>Lachnum</i>           | 0.00E+00            | 0.00E+00                | 4.48E-04            | 1.61E-06                | 0.001          |
| <i>Leptoxyphium</i>      | 0.00E+00            | 0.00E+00                | 1.44E-04            | 1.63E-07                | 0.001          |
| <i>Membranomyces</i>     | 0.00E+00            | 0.00E+00                | 1.71E-04            | 1.34E-07                | 0.001          |
| <i>Monodictys</i>        | 0.00E+00            | 0.00E+00                | 1.14E-04            | 8.40E-08                | 0.001          |
| <i>Panaeolus</i>         | 0.00E+00            | 0.00E+00                | 1.07E-04            | 9.19E-08                | 0.001          |
| <i>Phaeoannellomyces</i> | 0.00E+00            | 0.00E+00                | 4.01E-04            | 5.51E-07                | 0.001          |
| <i>Sarcinomyces</i>      | 0.00E+00            | 0.00E+00                | 2.05E-04            | 3.36E-07                | 0.001          |
| <i>Scleroramularia</i>   | 0.00E+00            | 0.00E+00                | 3.55E-04            | 1.01E-06                | 0.001          |
| <i>Stagonospora</i>      | 0.00E+00            | 0.00E+00                | 1.73E-04            | 2.39E-07                | 0.001          |
| <i>Starmerella</i>       | 0.00E+00            | 0.00E+00                | 3.21E-04            | 8.13E-07                | 0.001          |
| <i>Sympodiella</i>       | 0.00E+00            | 0.00E+00                | 1.09E-04            | 9.55E-08                | 0.001          |
| <i>Taphrina</i>          | 0.00E+00            | 0.00E+00                | 1.05E-04            | 7.93E-08                | 0.001          |
| <i>Trichaleurina</i>     | 0.00E+00            | 0.00E+00                | 1.58E-04            | 1.99E-07                | 0.001          |
| <i>Tylophilus</i>        | 0.00E+00            | 0.00E+00                | 1.10E-04            | 9.68E-08                | 0.001          |
| <i>Westerdykella</i>     | 0.00E+00            | 0.00E+00                | 4.06E-04            | 1.32E-06                | 0.001          |
| <i>Wickerhamiella</i>    | 0.00E+00            | 0.00E+00                | 5.00E-04            | 1.98E-06                | 0.001          |
| <i>Xylaria</i>           | 0.00E+00            | 0.00E+00                | 1.35E-04            | 1.46E-07                | 0.001          |
| <i>Zopfiella</i>         | 0.00E+00            | 0.00E+00                | 2.99E-04            | 7.07E-07                | 0.001          |
| <i>Rhinocladiella</i>    | 2.18E-05            | 3.81E-09                | 5.71E-03            | 6.76E-05                | 0.001          |
| <i>Remersonia</i>        | 2.04E-03            | 7.44E-07                | 5.34E-04            | 4.81E-07                | 0.003          |
| <i>Trichocladium</i>     | 1.15E-03            | 1.09E-06                | 5.19E-06            | 2.15E-10                | 0.004          |
| <i>Fusicolla</i>         | 2.67E-03            | 4.80E-06                | 5.54E-04            | 4.93E-07                | 0.005          |
| <i>Tetracladium</i>      | 1.34E-03            | 7.78E-07                | 3.51E-04            | 1.59E-07                | 0.016          |
| <i>Torula</i>            | 6.30E-04            | 1.95E-07                | 1.84E-04            | 4.32E-08                | 0.018          |
| <i>Condenascus</i>       | 7.47E-03            | 2.01E-05                | 2.39E-03            | 7.61E-06                | 0.019          |
| <i>Neooccultibambusa</i> | 2.33E-04            | 1.15E-07                | 9.49E-06            | 7.20E-10                | 0.019          |
| <i>Solicoccozyma</i>     | 1.66E-03            | 1.88E-06                | 4.08E-04            | 2.62E-07                | 0.019          |
| <i>Podosphaera</i>       | 3.11E-04            | 1.45E-07                | 1.73E-06            | 2.39E-11                | 0.020          |
| <i>Pseudogymnoascus</i>  | 1.82E-06            | 2.65E-11                | 1.32E-04            | 5.12E-08                | 0.020          |
| <i>Sebacina</i>          | 1.43E-02            | 2.19E-04                | 2.74E-03            | 9.12E-06                | 0.020          |

|                            |          |          |          |          |       |
|----------------------------|----------|----------|----------|----------|-------|
| <i>Mortierella</i>         | 2.81E-02 | 1.04E-04 | 1.32E-02 | 1.70E-04 | 0.023 |
| <i>Leohumicola</i>         | 3.54E-03 | 1.90E-05 | 8.69E-04 | 1.23E-06 | 0.024 |
| <i>Microdochium</i>        | 2.40E-03 | 6.05E-06 | 5.09E-04 | 1.88E-07 | 0.024 |
| <i>Humicola</i>            | 6.62E-03 | 1.96E-05 | 2.14E-03 | 5.79E-06 | 0.026 |
| <i>Phaeosphaeria</i>       | 4.03E-04 | 3.05E-07 | 2.41E-05 | 3.98E-09 | 0.027 |
| <i>Hygrocybe</i>           | 1.70E-02 | 8.62E-04 | 2.30E-03 | 8.33E-06 | 0.028 |
| <i>Meyerozyma</i>          | 1.34E-03 | 6.86E-06 | 2.87E-02 | 2.17E-03 | 0.030 |
| <i>Lepiota</i>             | 2.88E-03 | 6.69E-06 | 5.76E-04 | 5.26E-07 | 0.031 |
| <i>Cephalotrichum</i>      | 8.04E-04 | 9.63E-07 | 1.02E-04 | 3.68E-08 | 0.032 |
| <i>Boletus</i>             | 9.52E-04 | 1.52E-06 | 5.17E-05 | 9.40E-09 | 0.038 |
| <i>Podospora</i>           | 1.14E-03 | 7.07E-07 | 4.18E-04 | 1.96E-07 | 0.039 |
| <i>Lectera</i>             | 3.47E-03 | 5.04E-06 | 1.29E-03 | 2.44E-06 | 0.041 |
| <i>Achroceratosphaeria</i> | 7.52E-03 | 6.32E-05 | 1.61E-03 | 3.93E-06 | 0.044 |
| <i>Echria</i>              | 3.06E-03 | 9.55E-06 | 6.21E-04 | 1.35E-06 | 0.045 |
| <i>Bullera</i>             | 8.21E-05 | 3.39E-08 | 8.98E-04 | 1.56E-06 | 0.048 |
| <i>Paraphaeosphaeria</i>   | 5.01E-04 | 8.47E-07 | 2.04E-05 | 1.95E-09 | 0.049 |
| <i>Agrocybe</i>            | 1.57E-04 | 1.98E-07 | 0.00E+00 | 0.00E+00 | 0.001 |
| <i>Ballistosporomyces</i>  | 1.61E-04 | 2.07E-07 | 0.00E+00 | 0.00E+00 | 0.001 |
| <i>Brycekendrickomyces</i> | 1.27E-04 | 1.30E-07 | 0.00E+00 | 0.00E+00 | 0.001 |
| <i>Campylocarpon</i>       | 1.92E-04 | 2.31E-07 | 0.00E+00 | 0.00E+00 | 0.001 |
| <i>Coniophora</i>          | 1.04E-04 | 8.64E-08 | 0.00E+00 | 0.00E+00 | 0.001 |
| <i>Coprinus</i>            | 1.36E-03 | 1.48E-05 | 0.00E+00 | 0.00E+00 | 0.001 |
| <i>Eleutheromyces</i>      | 1.15E-04 | 1.05E-07 | 0.00E+00 | 0.00E+00 | 0.001 |
| <i>Geopora</i>             | 2.58E-04 | 3.40E-07 | 0.00E+00 | 0.00E+00 | 0.001 |
| <i>Gliocephalotrichum</i>  | 1.57E-04 | 1.98E-07 | 0.00E+00 | 0.00E+00 | 0.001 |
| <i>Lasiodiplodia</i>       | 1.44E-04 | 1.62E-07 | 0.00E+00 | 0.00E+00 | 0.001 |
| <i>Leotia</i>              | 3.01E-04 | 3.91E-07 | 0.00E+00 | 0.00E+00 | 0.001 |
| <i>Leptodiscella</i>       | 2.44E-04 | 2.65E-07 | 0.00E+00 | 0.00E+00 | 0.001 |
| <i>Limonomyces</i>         | 1.40E-04 | 1.38E-07 | 0.00E+00 | 0.00E+00 | 0.001 |
| <i>Madurella</i>           | 1.03E-04 | 7.25E-08 | 0.00E+00 | 0.00E+00 | 0.001 |
| <i>Minimedusa</i>          | 1.09E-04 | 9.58E-08 | 0.00E+00 | 0.00E+00 | 0.001 |
| <i>Minutisphaera</i>       | 2.05E-04 | 3.37E-07 | 0.00E+00 | 0.00E+00 | 0.001 |
| <i>Neoascochyta</i>        | 3.20E-04 | 4.21E-07 | 0.00E+00 | 0.00E+00 | 0.001 |
| <i>Neodactylaria</i>       | 2.55E-04 | 5.22E-07 | 0.00E+00 | 0.00E+00 | 0.001 |
| <i>Nothodactylaria</i>     | 1.29E-04 | 6.22E-08 | 0.00E+00 | 0.00E+00 | 0.001 |
| <i>Parasola</i>            | 2.48E-04 | 3.91E-07 | 0.00E+00 | 0.00E+00 | 0.001 |
| <i>Penicillifer</i>        | 1.54E-04 | 1.90E-07 | 0.00E+00 | 0.00E+00 | 0.001 |
| <i>Peniophorella</i>       | 4.64E-04 | 1.41E-06 | 0.00E+00 | 0.00E+00 | 0.001 |
| <i>Phaeobotryon</i>        | 1.47E-04 | 1.09E-07 | 0.00E+00 | 0.00E+00 | 0.001 |
| <i>Pilidium</i>            | 1.48E-04 | 7.86E-08 | 0.00E+00 | 0.00E+00 | 0.001 |
| <i>Pisolithus</i>          | 5.19E-04 | 8.06E-07 | 0.00E+00 | 0.00E+00 | 0.001 |
| <i>Powellomyces</i>        | 1.15E-04 | 1.05E-07 | 0.00E+00 | 0.00E+00 | 0.001 |
| <i>Pseudaleuria</i>        | 2.27E-04 | 3.90E-07 | 0.00E+00 | 0.00E+00 | 0.001 |
| <i>Rhizoctonia</i>         | 1.83E-04 | 1.75E-07 | 0.00E+00 | 0.00E+00 | 0.001 |

|                            |          |          |          |          |       |
|----------------------------|----------|----------|----------|----------|-------|
| <i>Rotiferophthora</i>     | 1.11E-04 | 9.88E-08 | 0.00E+00 | 0.00E+00 | 0.001 |
| <i>Sphaerellopsis</i>      | 1.76E-04 | 2.42E-07 | 0.00E+00 | 0.00E+00 | 0.001 |
| <i>Sporisorium</i>         | 1.25E-04 | 1.21E-07 | 0.00E+00 | 0.00E+00 | 0.001 |
| <i>Subsessila</i>          | 2.03E-04 | 3.30E-07 | 0.00E+00 | 0.00E+00 | 0.001 |
| <i>Symbiotaphrina</i>      | 4.52E-04 | 7.72E-07 | 0.00E+00 | 0.00E+00 | 0.001 |
| <i>Thermothielavioides</i> | 2.16E-04 | 3.73E-07 | 0.00E+00 | 0.00E+00 | 0.001 |
| <i>Towyspora</i>           | 2.53E-04 | 2.37E-07 | 0.00E+00 | 0.00E+00 | 0.001 |
| <i>Tylospora</i>           | 1.17E-04 | 1.10E-07 | 0.00E+00 | 0.00E+00 | 0.001 |
| <i>Virgaria</i>            | 1.84E-04 | 2.72E-07 | 0.00E+00 | 0.00E+00 | 0.001 |
| <i>Conocybe</i>            | 9.51E-04 | 6.80E-06 | 1.58E-06 | 2.00E-11 | 0.007 |
| <i>Acremonium</i>          | 7.48E-03 | 7.57E-06 | 2.33E-03 | 5.00E-06 | 0.001 |

Supplementary Table 2 Edge property analysis among different fungal genera

| <b>Source</b>          | <b>Target</b>              | <b>weight</b> | <b>color</b> |
|------------------------|----------------------------|---------------|--------------|
| <i>Wickerhamomyces</i> | <i>Penicillium</i>         | 0.6706        | negative     |
| <i>Wickerhamomyces</i> | <i>Fusarium</i>            | 0.6088        | negative     |
| <i>Wickerhamomyces</i> | <i>Mortierella</i>         | 0.6941        | negative     |
| <i>Wickerhamomyces</i> | <i>Aspergillus</i>         | 0.7029        | negative     |
| <i>Wickerhamomyces</i> | <i>Sagenomella</i>         | 0.5912        | negative     |
| <i>Wickerhamomyces</i> | <i>Meyerozyma</i>          | 0.6941        | positive     |
| <i>Wickerhamomyces</i> | <i>Eleutherascus</i>       | 0.5382        | negative     |
| <i>Wickerhamomyces</i> | <i>Saitozyma</i>           | 0.55          | negative     |
| <i>Wickerhamomyces</i> | <i>Triangularia</i>        | 0.8794        | negative     |
| <i>Wickerhamomyces</i> | <i>Sebacina</i>            | 0.8794        | negative     |
| <i>Wickerhamomyces</i> | <i>Russula</i>             | 0.7588        | negative     |
| <i>Wickerhamomyces</i> | <i>Condenascus</i>         | 0.8147        | negative     |
| <i>Wickerhamomyces</i> | <i>Acremonium</i>          | 0.6           | negative     |
| <i>Wickerhamomyces</i> | <i>Achroceratosphaeria</i> | 0.65          | negative     |
| <i>Wickerhamomyces</i> | <i>Humicola</i>            | 0.8294        | negative     |
| <i>Wickerhamomyces</i> | <i>Trichoderma</i>         | 0.6706        | negative     |
| <i>Wickerhamomyces</i> | <i>Arxiella</i>            | 0.7195        | negative     |
| <i>Wickerhamomyces</i> | <i>Gibellulopsis</i>       | 0.6206        | negative     |
| <i>Wickerhamomyces</i> | <i>Botryotrichum</i>       | 0.5618        | negative     |
| <i>Wickerhamomyces</i> | <i>Rhinochadiella</i>      | 0.5451        | positive     |
| <i>Wickerhamomyces</i> | <i>Candida</i>             | 0.6706        | negative     |
| <i>Wickerhamomyces</i> | <i>Lectera</i>             | 0.5618        | negative     |
| <i>Wickerhamomyces</i> | <i>Stolonocarpus</i>       | 0.6445        | negative     |
| <i>Wickerhamomyces</i> | <i>Leohumicola</i>         | 0.5294        | negative     |
| <i>Wickerhamomyces</i> | <i>Thermomyces</i>         | 0.5559        | negative     |
| <i>Wickerhamomyces</i> | <i>Lepiota</i>             | 0.7994        | negative     |
| <i>Wickerhamomyces</i> | <i>Fusicolla</i>           | 0.5615        | negative     |
| <i>Wickerhamomyces</i> | <i>Arthrographis</i>       | 0.5553        | negative     |

---

|                        |                            |        |          |
|------------------------|----------------------------|--------|----------|
| <i>Wickerhamomyces</i> | <i>Ceratobasidium</i>      | 0.5422 | negative |
| <i>Wickerhamomyces</i> | <i>Remersonia</i>          | 0.5147 | negative |
| <i>Wickerhamomyces</i> | <i>Xerochrysum</i>         | 0.5319 | negative |
| <i>Wickerhamomyces</i> | <i>Mycoarthris</i>         | 0.6657 | negative |
| <i>Wickerhamomyces</i> | <i>Exophiala</i>           | 0.6637 | negative |
| <i>Wickerhamomyces</i> | <i>Tomentella</i>          | 0.5408 | negative |
| <i>Alternaria</i>      | <i>Cystofilobasidium</i>   | 0.5059 | positive |
| <i>Alternaria</i>      | <i>Sagenomella</i>         | 0.5147 | negative |
| <i>Alternaria</i>      | <i>Chaetomium</i>          | 0.5176 | negative |
| <i>Alternaria</i>      | <i>Trichosporon</i>        | 0.5912 | negative |
| <i>Alternaria</i>      | <i>Sebacina</i>            | 0.5647 | negative |
| <i>Alternaria</i>      | <i>Russula</i>             | 0.5559 | negative |
| <i>Alternaria</i>      | <i>Schizothecium</i>       | 0.6343 | negative |
| <i>Alternaria</i>      | <i>Acremonium</i>          | 0.6647 | negative |
| <i>Alternaria</i>      | <i>Arthrinium</i>          | 0.6284 | positive |
| <i>Alternaria</i>      | <i>Achroceratosphaeria</i> | 0.5559 | negative |
| <i>Alternaria</i>      | <i>Humicola</i>            | 0.5206 | negative |
| <i>Alternaria</i>      | <i>Metarhizium</i>         | 0.6294 | negative |
| <i>Alternaria</i>      | <i>Curvularia</i>          | 0.5636 | positive |
| <i>Alternaria</i>      | <i>Tricholoma</i>          | 0.5887 | negative |
| <i>Alternaria</i>      | <i>Kazachstania</i>        | 0.6461 | negative |
| <i>Alternaria</i>      | <i>Fusicolla</i>           | 0.5156 | negative |
| <i>Alternaria</i>      | <i>Iodophanus</i>          | 0.568  | negative |
| <i>Alternaria</i>      | <i>Tomentella</i>          | 0.5215 | negative |
| <i>Alternaria</i>      | <i>Colletotrichum</i>      | 0.5151 | negative |
| <i>Penicillium</i>     | <i>Talaromyces</i>         | 0.6471 | positive |
| <i>Penicillium</i>     | <i>Aspergillus</i>         | 0.6265 | positive |
| <i>Penicillium</i>     | <i>Meyerozyma</i>          | 0.5088 | negative |
| <i>Penicillium</i>     | <i>Triangularia</i>        | 0.5941 | positive |
| <i>Penicillium</i>     | <i>Sebacina</i>            | 0.6324 | positive |
| <i>Penicillium</i>     | <i>Russula</i>             | 0.6029 | positive |
| <i>Penicillium</i>     | <i>Condenascus</i>         | 0.6324 | positive |
| <i>Penicillium</i>     | <i>Acremonium</i>          | 0.5971 | positive |
| <i>Penicillium</i>     | <i>Achroceratosphaeria</i> | 0.5206 | positive |
| <i>Penicillium</i>     | <i>Humicola</i>            | 0.6441 | positive |
| <i>Penicillium</i>     | <i>Trichoderma</i>         | 0.5588 | positive |
| <i>Penicillium</i>     | <i>Botryotrichum</i>       | 0.5235 | positive |
| <i>Penicillium</i>     | <i>Gymnoascus</i>          | 0.5378 | positive |
| <i>Penicillium</i>     | <i>Stolonocarpus</i>       | 0.7156 | positive |
| <i>Penicillium</i>     | <i>Myrmecridium</i>        | 0.6676 | positive |
| <i>Penicillium</i>     | <i>Thermomyces</i>         | 0.6294 | positive |
| <i>Penicillium</i>     | <i>Lepiota</i>             | 0.5221 | positive |
| <i>Penicillium</i>     | <i>Arthrographis</i>       | 0.6299 | positive |
| <i>Penicillium</i>     | <i>Tomentella</i>          | 0.5096 | positive |

---

---

|                          |                            |        |          |
|--------------------------|----------------------------|--------|----------|
| <i>Penicillium</i>       | <i>Colletotrichum</i>      | 0.4989 | positive |
| <i>Fusarium</i>          | <i>Filobasidium</i>        | 0.6353 | negative |
| <i>Fusarium</i>          | <i>Mortierella</i>         | 0.65   | positive |
| <i>Fusarium</i>          | <i>Aspergillus</i>         | 0.5029 | positive |
| <i>Fusarium</i>          | <i>Meyerozyma</i>          | 0.7088 | negative |
| <i>Fusarium</i>          | <i>Saitozyma</i>           | 0.5941 | positive |
| <i>Fusarium</i>          | <i>Hygrocybe</i>           | 0.6029 | positive |
| <i>Fusarium</i>          | <i>Triangularia</i>        | 0.5824 | positive |
| <i>Fusarium</i>          | <i>Sebacina</i>            | 0.6588 | positive |
| <i>Fusarium</i>          | <i>Russula</i>             | 0.6941 | positive |
| <i>Fusarium</i>          | <i>Condenascus</i>         | 0.6059 | positive |
| <i>Fusarium</i>          | <i>Acremonium</i>          | 0.7176 | positive |
| <i>Fusarium</i>          | <i>Humicola</i>            | 0.5735 | positive |
| <i>Fusarium</i>          | <i>Nigrospora</i>          | 0.5029 | positive |
| <i>Fusarium</i>          | <i>Trichoderma</i>         | 0.5059 | positive |
| <i>Fusarium</i>          | <i>Rhinochadiella</i>      | 0.622  | negative |
| <i>Fusarium</i>          | <i>Metarhizium</i>         | 0.5559 | positive |
| <i>Fusarium</i>          | <i>Candida</i>             | 0.6853 | positive |
| <i>Fusarium</i>          | <i>Lectera</i>             | 0.85   | positive |
| <i>Fusarium</i>          | <i>Leohumicola</i>         | 0.8824 | positive |
| <i>Fusarium</i>          | <i>Myrmecridium</i>        | 0.5824 | positive |
| <i>Fusarium</i>          | <i>Clonostachys</i>        | 0.7088 | positive |
| <i>Fusarium</i>          | <i>Lepiota</i>             | 0.5634 | positive |
| <i>Fusarium</i>          | <i>Microdochium</i>        | 0.6706 | positive |
| <i>Fusarium</i>          | <i>Xerochrysiium</i>       | 0.523  | positive |
| <i>Fusarium</i>          | <i>Exophiala</i>           | 0.5782 | positive |
| <i>Fusarium</i>          | <i>Tomentella</i>          | 0.5793 | positive |
| <i>Cystofilobasidium</i> | <i>Mortierella</i>         | 0.5941 | negative |
| <i>Cystofilobasidium</i> | <i>Sagenomella</i>         | 0.5265 | negative |
| <i>Cystofilobasidium</i> | <i>Eleutherascus</i>       | 0.6    | negative |
| <i>Cystofilobasidium</i> | <i>Saitozyma</i>           | 0.6265 | negative |
| <i>Cystofilobasidium</i> | <i>Chaetomium</i>          | 0.6235 | negative |
| <i>Cystofilobasidium</i> | <i>Trichosporon</i>        | 0.7    | negative |
| <i>Cystofilobasidium</i> | <i>Triangularia</i>        | 0.6941 | negative |
| <i>Cystofilobasidium</i> | <i>Sebacina</i>            | 0.7029 | negative |
| <i>Cystofilobasidium</i> | <i>Russula</i>             | 0.6618 | negative |
| <i>Cystofilobasidium</i> | <i>Schizothecium</i>       | 0.7035 | negative |
| <i>Cystofilobasidium</i> | <i>Archaeorhizomyces</i>   | 0.7118 | negative |
| <i>Cystofilobasidium</i> | <i>Condenascus</i>         | 0.5971 | negative |
| <i>Cystofilobasidium</i> | <i>Acremonium</i>          | 0.6206 | negative |
| <i>Cystofilobasidium</i> | <i>Arthriniium</i>         | 0.6431 | positive |
| <i>Cystofilobasidium</i> | <i>Achroceratosphaeria</i> | 0.5882 | negative |
| <i>Cystofilobasidium</i> | <i>Humicola</i>            | 0.6676 | negative |
| <i>Cystofilobasidium</i> | <i>Trichoderma</i>         | 0.75   | negative |

---

---

|                          |                       |        |          |
|--------------------------|-----------------------|--------|----------|
| <i>Cystofilobasidium</i> | <i>Leptobacillium</i> | 0.6529 | negative |
| <i>Cystofilobasidium</i> | <i>Arxiella</i>       | 0.5523 | negative |
| <i>Cystofilobasidium</i> | <i>Gibellulopsis</i>  | 0.7765 | negative |
| <i>Cystofilobasidium</i> | <i>Botryotrichum</i>  | 0.65   | negative |
| <i>Cystofilobasidium</i> | <i>Metarhizium</i>    | 0.5676 | negative |
| <i>Cystofilobasidium</i> | <i>Oidiodendron</i>   | 0.6313 | negative |
| <i>Cystofilobasidium</i> | <i>Stolonocarpus</i>  | 0.5037 | negative |
| <i>Cystofilobasidium</i> | <i>Cercospora</i>     | 0.5754 | negative |
| <i>Cystofilobasidium</i> | <i>Mycothermus</i>    | 0.5605 | negative |
| <i>Cystofilobasidium</i> | <i>Fusicolla</i>      | 0.6963 | negative |
| <i>Cystofilobasidium</i> | <i>Ceratobasidium</i> | 0.6563 | negative |
| <i>Cystofilobasidium</i> | <i>Remersonia</i>     | 0.6765 | negative |
| <i>Cystofilobasidium</i> | <i>Xerochrysum</i>    | 0.5008 | negative |
| <i>Cystofilobasidium</i> | <i>Mycoarthritis</i>  | 0.5284 | negative |
| <i>Cystofilobasidium</i> | <i>Colletotrichum</i> | 0.6093 | negative |
| <i>Cladosporium</i>      | <i>Filobasidium</i>   | 0.6294 | positive |
| <i>Cladosporium</i>      | <i>Thelebolus</i>     | 0.5843 | negative |
| <i>Cladosporium</i>      | <i>Thermomyces</i>    | 0.5794 | negative |
| <i>Cladosporium</i>      | <i>Tricholoma</i>     | 0.4974 | negative |
| <i>Cladosporium</i>      | <i>Tomentella</i>     | 0.5052 | negative |
| <i>Filobasidium</i>      | <i>Mortierella</i>    | 0.6471 | negative |
| <i>Filobasidium</i>      | <i>Meyerozyma</i>     | 0.5647 | positive |
| <i>Filobasidium</i>      | <i>Eleutherascus</i>  | 0.5206 | negative |
| <i>Filobasidium</i>      | <i>Saitozyma</i>      | 0.6147 | negative |
| <i>Filobasidium</i>      | <i>Acremonium</i>     | 0.5059 | negative |
| <i>Filobasidium</i>      | <i>Rhinocladiella</i> | 0.6377 | positive |
| <i>Filobasidium</i>      | <i>Candida</i>        | 0.5676 | negative |
| <i>Filobasidium</i>      | <i>Lectera</i>        | 0.75   | negative |
| <i>Filobasidium</i>      | <i>Leohumicola</i>    | 0.6147 | negative |
| <i>Filobasidium</i>      | <i>Echria</i>         | 0.6471 | negative |
| <i>Filobasidium</i>      | <i>Microdochium</i>   | 0.55   | negative |
| <i>Filobasidium</i>      | <i>Paraphoma</i>      | 0.5471 | negative |
| <i>Talaromyces</i>       | <i>Aspergillus</i>    | 0.5324 | positive |
| <i>Talaromyces</i>       | <i>Sagenomella</i>    | 0.5647 | positive |
| <i>Talaromyces</i>       | <i>Acremonium</i>     | 0.5088 | positive |
| <i>Talaromyces</i>       | <i>Candida</i>        | 0.5206 | positive |
| <i>Talaromyces</i>       | <i>Curvularia</i>     | 0.6152 | negative |
| <i>Talaromyces</i>       | <i>Myrmecridium</i>   | 0.5412 | positive |
| <i>Talaromyces</i>       | <i>Thermomyces</i>    | 0.5559 | positive |
| <i>Talaromyces</i>       | <i>Lepiota</i>        | 0.5103 | positive |
| <i>Talaromyces</i>       | <i>Tricholoma</i>     | 0.5136 | positive |
| <i>Talaromyces</i>       | <i>Kazachstania</i>   | 0.6431 | positive |
| <i>Talaromyces</i>       | <i>Arthrographis</i>  | 0.818  | positive |
| <i>Talaromyces</i>       | <i>Tomentella</i>     | 0.5585 | positive |

---

---

|                    |                            |        |          |
|--------------------|----------------------------|--------|----------|
| <i>Mortierella</i> | <i>Aspergillus</i>         | 0.7088 | positive |
| <i>Mortierella</i> | <i>Meyerozyma</i>          | 0.6324 | negative |
| <i>Mortierella</i> | <i>Eleutherascus</i>       | 0.5441 | positive |
| <i>Mortierella</i> | <i>Saitozyma</i>           | 0.6059 | positive |
| <i>Mortierella</i> | <i>Hygrocybe</i>           | 0.5794 | positive |
| <i>Mortierella</i> | <i>Triangularia</i>        | 0.6706 | positive |
| <i>Mortierella</i> | <i>Sebacina</i>            | 0.7059 | positive |
| <i>Mortierella</i> | <i>Russula</i>             | 0.6147 | positive |
| <i>Mortierella</i> | <i>Archaeorhizomyces</i>   | 0.6382 | positive |
| <i>Mortierella</i> | <i>Condenascus</i>         | 0.8059 | positive |
| <i>Mortierella</i> | <i>Acremonium</i>          | 0.7324 | positive |
| <i>Mortierella</i> | <i>Achroceratosphaeria</i> | 0.6265 | positive |
| <i>Mortierella</i> | <i>Humicola</i>            | 0.7912 | positive |
| <i>Mortierella</i> | <i>Trichoderma</i>         | 0.6118 | positive |
| <i>Mortierella</i> | <i>Leptobacillium</i>      | 0.7235 | positive |
| <i>Mortierella</i> | <i>Arxiella</i>            | 0.7225 | positive |
| <i>Mortierella</i> | <i>Gibellulopsis</i>       | 0.5265 | positive |
| <i>Mortierella</i> | <i>Rhodotorula</i>         | 0.5401 | negative |
| <i>Mortierella</i> | <i>Botryotrichum</i>       | 0.5029 | positive |
| <i>Mortierella</i> | <i>Pyrenochaetopsis</i>    | 0.5559 | positive |
| <i>Mortierella</i> | <i>Rhinocladiella</i>      | 0.7069 | negative |
| <i>Mortierella</i> | <i>Metarhizium</i>         | 0.6765 | positive |
| <i>Mortierella</i> | <i>Candida</i>             | 0.7647 | positive |
| <i>Mortierella</i> | <i>Lectera</i>             | 0.6676 | positive |
| <i>Mortierella</i> | <i>Stolonocarpus</i>       | 0.6771 | positive |
| <i>Mortierella</i> | <i>Leohumicola</i>         | 0.7    | positive |
| <i>Mortierella</i> | <i>Myrmecridium</i>        | 0.5324 | positive |
| <i>Mortierella</i> | <i>Wallemia</i>            | 0.5    | positive |
| <i>Mortierella</i> | <i>Clonostachys</i>        | 0.5    | positive |
| <i>Mortierella</i> | <i>Lepiota</i>             | 0.6224 | positive |
| <i>Mortierella</i> | <i>Fusicolla</i>           | 0.8104 | positive |
| <i>Mortierella</i> | <i>Microdochium</i>        | 0.5118 | positive |
| <i>Mortierella</i> | <i>Paraphoma</i>           | 0.8029 | positive |
| <i>Mortierella</i> | <i>Remersonia</i>          | 0.6147 | positive |
| <i>Mortierella</i> | <i>Exophiala</i>           | 0.6136 | positive |
| <i>Mortierella</i> | <i>Colletotrichum</i>      | 0.6152 | positive |
| <i>Aspergillus</i> | <i>Sagenomella</i>         | 0.5088 | positive |
| <i>Aspergillus</i> | <i>Meyerozyma</i>          | 0.5029 | negative |
| <i>Aspergillus</i> | <i>Saitozyma</i>           | 0.5206 | positive |
| <i>Aspergillus</i> | <i>Triangularia</i>        | 0.6824 | positive |
| <i>Aspergillus</i> | <i>Sebacina</i>            | 0.6941 | positive |
| <i>Aspergillus</i> | <i>Russula</i>             | 0.6765 | positive |
| <i>Aspergillus</i> | <i>Condenascus</i>         | 0.7206 | positive |
| <i>Aspergillus</i> | <i>Acremonium</i>          | 0.5882 | positive |

---

---

|                    |                            |        |          |
|--------------------|----------------------------|--------|----------|
| <i>Aspergillus</i> | <i>Achroceratosphaeria</i> | 0.7    | positive |
| <i>Aspergillus</i> | <i>Humicola</i>            | 0.7765 | positive |
| <i>Aspergillus</i> | <i>Trichoderma</i>         | 0.5647 | positive |
| <i>Aspergillus</i> | <i>Leptobacillium</i>      | 0.6618 | positive |
| <i>Aspergillus</i> | <i>Arxiella</i>            | 0.827  | positive |
| <i>Aspergillus</i> | <i>Cystobasidium</i>       | 0.5695 | negative |
| <i>Aspergillus</i> | <i>Botryotrichum</i>       | 0.5176 | positive |
| <i>Aspergillus</i> | <i>Metarhizium</i>         | 0.6118 | positive |
| <i>Aspergillus</i> | <i>Candida</i>             | 0.7824 | positive |
| <i>Aspergillus</i> | <i>Lectera</i>             | 0.5176 | positive |
| <i>Aspergillus</i> | <i>Gymnoascus</i>          | 0.5867 | positive |
| <i>Aspergillus</i> | <i>Stolonocarpus</i>       | 0.6371 | positive |
| <i>Aspergillus</i> | <i>Myrmecridium</i>        | 0.6324 | positive |
| <i>Aspergillus</i> | <i>Thermomyces</i>         | 0.5912 | positive |
| <i>Aspergillus</i> | <i>Wallemia</i>            | 0.6824 | positive |
| <i>Aspergillus</i> | <i>Lepiota</i>             | 0.764  | positive |
| <i>Aspergillus</i> | <i>Kazachstania</i>        | 0.5195 | positive |
| <i>Aspergillus</i> | <i>Thermoascus</i>         | 0.6402 | positive |
| <i>Aspergillus</i> | <i>Arthrographis</i>       | 0.7762 | positive |
| <i>Aspergillus</i> | <i>Paraphoma</i>           | 0.7294 | positive |
| <i>Aspergillus</i> | <i>Xerochrysum</i>         | 0.6578 | positive |
| <i>Aspergillus</i> | <i>Exophiala</i>           | 0.6932 | positive |
| <i>Aspergillus</i> | <i>Tomentella</i>          | 0.6178 | positive |
| <i>Aspergillus</i> | <i>Colletotrichum</i>      | 0.6887 | positive |
| <i>Sagenomella</i> | <i>Saitozyma</i>           | 0.6824 | positive |
| <i>Sagenomella</i> | <i>Triangularia</i>        | 0.7559 | positive |
| <i>Sagenomella</i> | <i>Sebacina</i>            | 0.6559 | positive |
| <i>Sagenomella</i> | <i>Russula</i>             | 0.6971 | positive |
| <i>Sagenomella</i> | <i>Condenascus</i>         | 0.5088 | positive |
| <i>Sagenomella</i> | <i>Achroceratosphaeria</i> | 0.5265 | positive |
| <i>Sagenomella</i> | <i>Humicola</i>            | 0.5559 | positive |
| <i>Sagenomella</i> | <i>Trichoderma</i>         | 0.5853 | positive |
| <i>Sagenomella</i> | <i>Leptobacillium</i>      | 0.5    | positive |
| <i>Sagenomella</i> | <i>Arxiella</i>            | 0.5613 | positive |
| <i>Sagenomella</i> | <i>Gibellulopsis</i>       | 0.7    | positive |
| <i>Sagenomella</i> | <i>Botryotrichum</i>       | 0.5147 | positive |
| <i>Sagenomella</i> | <i>Candida</i>             | 0.5971 | positive |
| <i>Sagenomella</i> | <i>Cercospora</i>          | 0.7241 | positive |
| <i>Sagenomella</i> | <i>Mycothermus</i>         | 0.7817 | positive |
| <i>Sagenomella</i> | <i>Lepiota</i>             | 0.6106 | positive |
| <i>Sagenomella</i> | <i>Tricholoma</i>          | 0.7005 | positive |
| <i>Sagenomella</i> | <i>Kazachstania</i>        | 0.7638 | positive |
| <i>Sagenomella</i> | <i>Stachybotrys</i>        | 0.5693 | positive |
| <i>Sagenomella</i> | <i>Arthrographis</i>       | 0.6329 | positive |

---



---

|                      |                            |        |          |
|----------------------|----------------------------|--------|----------|
| <i>Sagenomella</i>   | <i>Ceratobasidium</i>      | 0.5274 | positive |
| <i>Sagenomella</i>   | <i>Xerochrysiium</i>       | 0.5156 | positive |
| <i>Sagenomella</i>   | <i>Mycoarthritis</i>       | 0.5732 | positive |
| <i>Sagenomella</i>   | <i>Exophiala</i>           | 0.5959 | positive |
| <i>Meyerozyma</i>    | <i>Eleutherascus</i>       | 0.6265 | negative |
| <i>Meyerozyma</i>    | <i>Triangularia</i>        | 0.6353 | negative |
| <i>Meyerozyma</i>    | <i>Sebacina</i>            | 0.7794 | negative |
| <i>Meyerozyma</i>    | <i>Russula</i>             | 0.6471 | negative |
| <i>Meyerozyma</i>    | <i>Schizothecium</i>       | 0.5004 | negative |
| <i>Meyerozyma</i>    | <i>Condenascus</i>         | 0.5647 | negative |
| <i>Meyerozyma</i>    | <i>Acremonium</i>          | 0.7794 | negative |
| <i>Meyerozyma</i>    | <i>Achroceratosphaeria</i> | 0.5265 | negative |
| <i>Meyerozyma</i>    | <i>Humicola</i>            | 0.7118 | negative |
| <i>Meyerozyma</i>    | <i>Rhinochadiella</i>      | 0.6833 | positive |
| <i>Meyerozyma</i>    | <i>Metarhizium</i>         | 0.5235 | negative |
| <i>Meyerozyma</i>    | <i>Candida</i>             | 0.5735 | negative |
| <i>Meyerozyma</i>    | <i>Lectera</i>             | 0.6265 | negative |
| <i>Meyerozyma</i>    | <i>Stolonocarpus</i>       | 0.7052 | negative |
| <i>Meyerozyma</i>    | <i>Leohumicola</i>         | 0.7294 | negative |
| <i>Meyerozyma</i>    | <i>Myrmecridium</i>        | 0.5853 | negative |
| <i>Meyerozyma</i>    | <i>Thermomyces</i>         | 0.5118 | negative |
| <i>Meyerozyma</i>    | <i>Fusicolla</i>           | 0.6311 | negative |
| <i>Meyerozyma</i>    | <i>Microdochium</i>        | 0.6176 | negative |
| <i>Meyerozyma</i>    | <i>Arthrographis</i>       | 0.5314 | negative |
| <i>Meyerozyma</i>    | <i>Remersonia</i>          | 0.5824 | negative |
| <i>Meyerozyma</i>    | <i>Xerochrysiium</i>       | 0.5911 | negative |
| <i>Meyerozyma</i>    | <i>Tomentella</i>          | 0.603  | negative |
| <i>Meyerozyma</i>    | <i>Colletotrichum</i>      | 0.6269 | negative |
| <i>Eleutherascus</i> | <i>Sebacina</i>            | 0.5206 | positive |
| <i>Eleutherascus</i> | <i>Gibellulopsis</i>       | 0.6824 | positive |
| <i>Eleutherascus</i> | <i>Botryotrichum</i>       | 0.5088 | positive |
| <i>Eleutherascus</i> | <i>Rhinochadiella</i>      | 0.7226 | negative |
| <i>Eleutherascus</i> | <i>Fusicolla</i>           | 0.5304 | positive |
| <i>Saitozyma</i>     | <i>Chaetomium</i>          | 0.6824 | positive |
| <i>Saitozyma</i>     | <i>Cladorrhinum</i>        | 0.5912 | positive |
| <i>Saitozyma</i>     | <i>Triangularia</i>        | 0.5971 | positive |
| <i>Saitozyma</i>     | <i>Sebacina</i>            | 0.6    | positive |
| <i>Saitozyma</i>     | <i>Russula</i>             | 0.55   | positive |
| <i>Saitozyma</i>     | <i>Archaeorhizomyces</i>   | 0.6441 | positive |
| <i>Saitozyma</i>     | <i>Condenascus</i>         | 0.5294 | positive |
| <i>Saitozyma</i>     | <i>Humicola</i>            | 0.5382 | positive |
| <i>Saitozyma</i>     | <i>Gibellulopsis</i>       | 0.7294 | positive |
| <i>Saitozyma</i>     | <i>Metarhizium</i>         | 0.5    | positive |
| <i>Saitozyma</i>     | <i>Candida</i>             | 0.7382 | positive |

---

---

|                         |                            |        |          |
|-------------------------|----------------------------|--------|----------|
| <i>Saitozyma</i>        | <i>Lectera</i>             | 0.6971 | positive |
| <i>Saitozyma</i>        | <i>Oidiodendron</i>        | 0.6696 | positive |
| <i>Saitozyma</i>        | <i>Leohumicola</i>         | 0.6529 | positive |
| <i>Saitozyma</i>        | <i>Cercospora</i>          | 0.5636 | positive |
| <i>Saitozyma</i>        | <i>Mycothermus</i>         | 0.531  | positive |
| <i>Saitozyma</i>        | <i>Tricholoma</i>          | 0.7108 | positive |
| <i>Saitozyma</i>        | <i>Microdochium</i>        | 0.6    | positive |
| <i>Saitozyma</i>        | <i>Xerochrysum</i>         | 0.4978 | positive |
| <i>Saitozyma</i>        | <i>Exophiala</i>           | 0.7021 | positive |
| <i>Saitozyma</i>        | <i>Tomentella</i>          | 0.5111 | positive |
| <i>Chaetomium</i>       | <i>Trichosporon</i>        | 0.6588 | positive |
| <i>Chaetomium</i>       | <i>Archaeorhizomyces</i>   | 0.7794 | positive |
| <i>Chaetomium</i>       | <i>Leptobacillium</i>      | 0.5412 | positive |
| <i>Chaetomium</i>       | <i>Metarhizium</i>         | 0.5206 | positive |
| <i>Chaetomium</i>       | <i>Oidiodendron</i>        | 0.5254 | positive |
| <i>Chaetomium</i>       | <i>Tricholoma</i>          | 0.5857 | positive |
| <i>Chaetomium</i>       | <i>Paraphoma</i>           | 0.5088 | positive |
| <i>Chaetomium</i>       | <i>Exophiala</i>           | 0.5546 | positive |
| <i>Chaetomium</i>       | <i>Iodophanus</i>          | 0.5738 | positive |
| <i>Chaetomium</i>       | <i>Submersisphaeria</i>    | 0.5315 | positive |
| <i>Trichosporon</i>     | <i>Sebacina</i>            | 0.5059 | positive |
| <i>Trichosporon</i>     | <i>Schizothecium</i>       | 0.752  | positive |
| <i>Trichosporon</i>     | <i>Archaeorhizomyces</i>   | 0.6941 | positive |
| <i>Trichosporon</i>     | <i>Arthrinium</i>          | 0.5651 | negative |
| <i>Trichosporon</i>     | <i>Achroceratosphaeria</i> | 0.5971 | positive |
| <i>Trichosporon</i>     | <i>Humicola</i>            | 0.5147 | positive |
| <i>Trichosporon</i>     | <i>Trichoderma</i>         | 0.5941 | positive |
| <i>Trichosporon</i>     | <i>Leptobacillium</i>      | 0.5882 | positive |
| <i>Trichosporon</i>     | <i>Oidiodendron</i>        | 0.7285 | positive |
| <i>Trichosporon</i>     | <i>Cercospora</i>          | 0.5533 | positive |
| <i>Trichosporon</i>     | <i>Mycothermus</i>         | 0.649  | positive |
| <i>Trichosporon</i>     | <i>Stachybotrys</i>        | 0.7847 | positive |
| <i>Trichosporon</i>     | <i>Ceratobasidium</i>      | 0.52   | positive |
| <i>Trichosporon</i>     | <i>Mycoarthris</i>         | 0.621  | positive |
| <i>Trichosporon</i>     | <i>Exophiala</i>           | 0.5015 | positive |
| <i>Trichosporon</i>     | <i>Iodophanus</i>          | 0.5352 | positive |
| <i>Trichosporon</i>     | <i>Submersisphaeria</i>    | 0.5769 | positive |
| <i>Plectosphaerella</i> | <i>Stachybotrys</i>        | 0.5693 | positive |
| <i>Cladorrhinum</i>     | <i>Papiliotrema</i>        | 0.7353 | negative |
| <i>Cladorrhinum</i>     | <i>Schizothecium</i>       | 0.5018 | positive |
| <i>Cladorrhinum</i>     | <i>Gibellulopsis</i>       | 0.5353 | positive |
| <i>Cladorrhinum</i>     | <i>Oidiodendron</i>        | 0.6431 | positive |
| <i>Cladorrhinum</i>     | <i>Microdochium</i>        | 0.5676 | positive |
| <i>Hygrocybe</i>        | <i>Acremonium</i>          | 0.7676 | positive |

---

---

|                     |                            |        |          |
|---------------------|----------------------------|--------|----------|
| <i>Hygrocybe</i>    | <i>Leptobacillium</i>      | 0.5441 | positive |
| <i>Hygrocybe</i>    | <i>Metarhizium</i>         | 0.7647 | positive |
| <i>Hygrocybe</i>    | <i>Candida</i>             | 0.6971 | positive |
| <i>Hygrocybe</i>    | <i>Lectera</i>             | 0.8029 | positive |
| <i>Hygrocybe</i>    | <i>Leohumicola</i>         | 0.7853 | positive |
| <i>Hygrocybe</i>    | <i>Echria</i>              | 0.85   | positive |
| <i>Hygrocybe</i>    | <i>Clonostachys</i>        | 0.55   | positive |
| <i>Hygrocybe</i>    | <i>Tricholoma</i>          | 0.5681 | positive |
| <i>Hygrocybe</i>    | <i>Fusicolla</i>           | 0.5348 | positive |
| <i>Hygrocybe</i>    | <i>Microdochium</i>        | 0.9088 | positive |
| <i>Hygrocybe</i>    | <i>Paraphoma</i>           | 0.5588 | positive |
| <i>Hygrocybe</i>    | <i>Remersonia</i>          | 0.6882 | positive |
| <i>Triangularia</i> | <i>Sebacina</i>            | 0.9294 | positive |
| <i>Triangularia</i> | <i>Russula</i>             | 0.9235 | positive |
| <i>Triangularia</i> | <i>Schizothecium</i>       | 0.5769 | positive |
| <i>Triangularia</i> | <i>Archaeorhizomyces</i>   | 0.5529 | positive |
| <i>Triangularia</i> | <i>Condenascus</i>         | 0.8794 | positive |
| <i>Triangularia</i> | <i>Acremonium</i>          | 0.65   | positive |
| <i>Triangularia</i> | <i>Arthrimum</i>           | 0.5784 | negative |
| <i>Triangularia</i> | <i>Achroceratosphaeria</i> | 0.7853 | positive |
| <i>Triangularia</i> | <i>Humicola</i>            | 0.8912 | positive |
| <i>Triangularia</i> | <i>Trichoderma</i>         | 0.8882 | positive |
| <i>Triangularia</i> | <i>Leptobacillium</i>      | 0.5441 | positive |
| <i>Triangularia</i> | <i>Arxiella</i>            | 0.818  | positive |
| <i>Triangularia</i> | <i>Gibellulopsis</i>       | 0.7471 | positive |
| <i>Triangularia</i> | <i>Botryotrichum</i>       | 0.8147 | positive |
| <i>Triangularia</i> | <i>Candida</i>             | 0.6059 | positive |
| <i>Triangularia</i> | <i>Oidiodendron</i>        | 0.4974 | positive |
| <i>Triangularia</i> | <i>Gymnoascus</i>          | 0.6637 | positive |
| <i>Triangularia</i> | <i>Stolonocarpus</i>       | 0.7734 | positive |
| <i>Triangularia</i> | <i>Leohumicola</i>         | 0.5676 | positive |
| <i>Triangularia</i> | <i>Cercospora</i>          | 0.5857 | positive |
| <i>Triangularia</i> | <i>Myrmecridium</i>        | 0.6294 | positive |
| <i>Triangularia</i> | <i>Mycothermus</i>         | 0.6755 | positive |
| <i>Triangularia</i> | <i>Clonostachys</i>        | 0.5824 | positive |
| <i>Triangularia</i> | <i>Lepiota</i>             | 0.8171 | positive |
| <i>Triangularia</i> | <i>Kazachstania</i>        | 0.5828 | positive |
| <i>Triangularia</i> | <i>Fusicolla</i>           | 0.6119 | positive |
| <i>Triangularia</i> | <i>Stachybotrys</i>        | 0.5811 | positive |
| <i>Triangularia</i> | <i>Thermoascus</i>         | 0.5063 | positive |
| <i>Triangularia</i> | <i>Arthrographis</i>       | 0.5971 | positive |
| <i>Triangularia</i> | <i>Ceratobasidium</i>      | 0.7763 | positive |
| <i>Triangularia</i> | <i>Remersonia</i>          | 0.6294 | positive |
| <i>Triangularia</i> | <i>Xerochrysum</i>         | 0.6385 | positive |

---

---

|                     |                            |        |          |
|---------------------|----------------------------|--------|----------|
| <i>Triangularia</i> | <i>Mycoarthritis</i>       | 0.7046 | positive |
| <i>Triangularia</i> | <i>Exophiala</i>           | 0.6637 | positive |
| <i>Triangularia</i> | <i>Tomentella</i>          | 0.6296 | positive |
| <i>Triangularia</i> | <i>Colletotrichum</i>      | 0.677  | positive |
| <i>Sebacina</i>     | <i>Russula</i>             | 0.9    | positive |
| <i>Sebacina</i>     | <i>Schizothecium</i>       | 0.7035 | positive |
| <i>Sebacina</i>     | <i>Archaeorhizomyces</i>   | 0.5412 | positive |
| <i>Sebacina</i>     | <i>Condenascus</i>         | 0.8382 | positive |
| <i>Sebacina</i>     | <i>Acremonium</i>          | 0.7735 | positive |
| <i>Sebacina</i>     | <i>Arthrinium</i>          | 0.6534 | negative |
| <i>Sebacina</i>     | <i>Achroceratosphaeria</i> | 0.8382 | positive |
| <i>Sebacina</i>     | <i>Humicola</i>            | 0.9441 | positive |
| <i>Sebacina</i>     | <i>Trichoderma</i>         | 0.8294 | positive |
| <i>Sebacina</i>     | <i>Leptobacillium</i>      | 0.5412 | positive |
| <i>Sebacina</i>     | <i>Arxiella</i>            | 0.7404 | positive |
| <i>Sebacina</i>     | <i>Gibellulopsis</i>       | 0.6412 | positive |
| <i>Sebacina</i>     | <i>Botryotrichum</i>       | 0.7088 | positive |
| <i>Sebacina</i>     | <i>Rhinoclediella</i>      | 0.5388 | negative |
| <i>Sebacina</i>     | <i>Metarhizium</i>         | 0.5912 | positive |
| <i>Sebacina</i>     | <i>Candida</i>             | 0.6265 | positive |
| <i>Sebacina</i>     | <i>Lectera</i>             | 0.5294 | positive |
| <i>Sebacina</i>     | <i>Oidiodendron</i>        | 0.5578 | positive |
| <i>Sebacina</i>     | <i>Gymnoascus</i>          | 0.5615 | positive |
| <i>Sebacina</i>     | <i>Stolonocarpus</i>       | 0.7748 | positive |
| <i>Sebacina</i>     | <i>Leohumicola</i>         | 0.5824 | positive |
| <i>Sebacina</i>     | <i>Myrmecridium</i>        | 0.6706 | positive |
| <i>Sebacina</i>     | <i>Thermomyces</i>         | 0.5735 | positive |
| <i>Sebacina</i>     | <i>Mycothermus</i>         | 0.5929 | positive |
| <i>Sebacina</i>     | <i>Clonostachys</i>        | 0.55   | positive |
| <i>Sebacina</i>     | <i>Lepiota</i>             | 0.7847 | positive |
| <i>Sebacina</i>     | <i>Kazachstania</i>        | 0.6004 | positive |
| <i>Sebacina</i>     | <i>Fusicolla</i>           | 0.7052 | positive |
| <i>Sebacina</i>     | <i>Stachybotrys</i>        | 0.6077 | positive |
| <i>Sebacina</i>     | <i>Thermoascus</i>         | 0.5136 | positive |
| <i>Sebacina</i>     | <i>Arthrographis</i>       | 0.615  | positive |
| <i>Sebacina</i>     | <i>Ceratobasidium</i>      | 0.7156 | positive |
| <i>Sebacina</i>     | <i>Remersonia</i>          | 0.6353 | positive |
| <i>Sebacina</i>     | <i>Xerochrysum</i>         | 0.7334 | positive |
| <i>Sebacina</i>     | <i>Mycoarthritis</i>       | 0.7493 | positive |
| <i>Sebacina</i>     | <i>Exophiala</i>           | 0.6873 | positive |
| <i>Sebacina</i>     | <i>Tomentella</i>          | 0.7363 | positive |
| <i>Sebacina</i>     | <i>Colletotrichum</i>      | 0.7314 | positive |
| <i>Papiliotrema</i> | <i>Gibellulopsis</i>       | 0.5794 | negative |
| <i>Papiliotrema</i> | <i>Oidiodendron</i>        | 0.5798 | negative |

---

---

|                      |                            |        |          |
|----------------------|----------------------------|--------|----------|
| <i>Papiliotrema</i>  | <i>Remersonia</i>          | 0.5853 | negative |
| <i>Russula</i>       | <i>Schizothecium</i>       | 0.596  | positive |
| <i>Russula</i>       | <i>Archaeorhizomyces</i>   | 0.5353 | positive |
| <i>Russula</i>       | <i>Condenascus</i>         | 0.8029 | positive |
| <i>Russula</i>       | <i>Acremonium</i>          | 0.7324 | positive |
| <i>Russula</i>       | <i>Arthrinium</i>          | 0.5107 | negative |
| <i>Russula</i>       | <i>Achroceratosphaeria</i> | 0.8088 | positive |
| <i>Russula</i>       | <i>Humicola</i>            | 0.8588 | positive |
| <i>Russula</i>       | <i>Trichoderma</i>         | 0.9235 | positive |
| <i>Russula</i>       | <i>Leptobacillium</i>      | 0.5588 | positive |
| <i>Russula</i>       | <i>Arxiella</i>            | 0.7284 | positive |
| <i>Russula</i>       | <i>Gibellulopsis</i>       | 0.5647 | positive |
| <i>Russula</i>       | <i>Botryotrichum</i>       | 0.8265 | positive |
| <i>Russula</i>       | <i>Metarhizium</i>         | 0.5324 | positive |
| <i>Russula</i>       | <i>Candida</i>             | 0.5941 | positive |
| <i>Russula</i>       | <i>Lectera</i>             | 0.5176 | positive |
| <i>Russula</i>       | <i>Gymnoascus</i>          | 0.7585 | positive |
| <i>Russula</i>       | <i>Stolonocarpus</i>       | 0.7867 | positive |
| <i>Russula</i>       | <i>Leohumicola</i>         | 0.6382 | positive |
| <i>Russula</i>       | <i>Cercospora</i>          | 0.6122 | positive |
| <i>Russula</i>       | <i>Myrmecridium</i>        | 0.8235 | positive |
| <i>Russula</i>       | <i>Mycothermus</i>         | 0.6755 | positive |
| <i>Russula</i>       | <i>Clonostachys</i>        | 0.7147 | positive |
| <i>Russula</i>       | <i>Lepiota</i>             | 0.7817 | positive |
| <i>Russula</i>       | <i>Tricholoma</i>          | 0.5048 | positive |
| <i>Russula</i>       | <i>Kazachstania</i>        | 0.6726 | positive |
| <i>Russula</i>       | <i>Fusicolla</i>           | 0.5082 | positive |
| <i>Russula</i>       | <i>Stachybotrys</i>        | 0.6342 | positive |
| <i>Russula</i>       | <i>Thermoascus</i>         | 0.7005 | positive |
| <i>Russula</i>       | <i>Arthrographis</i>       | 0.6896 | positive |
| <i>Russula</i>       | <i>Ceratobasidium</i>      | 0.7348 | positive |
| <i>Russula</i>       | <i>Remersonia</i>          | 0.5824 | positive |
| <i>Russula</i>       | <i>Xerochrysum</i>         | 0.6474 | positive |
| <i>Russula</i>       | <i>Mycoarthris</i>         | 0.6478 | positive |
| <i>Russula</i>       | <i>Exophiala</i>           | 0.7109 | positive |
| <i>Russula</i>       | <i>Tomentella</i>          | 0.7585 | positive |
| <i>Russula</i>       | <i>Colletotrichum</i>      | 0.7726 | positive |
| <i>Schizothecium</i> | <i>Archaeorhizomyces</i>   | 0.5239 | positive |
| <i>Schizothecium</i> | <i>Acremonium</i>          | 0.5254 | positive |
| <i>Schizothecium</i> | <i>Arthrinium</i>          | 0.6436 | negative |
| <i>Schizothecium</i> | <i>Achroceratosphaeria</i> | 0.6372 | positive |
| <i>Schizothecium</i> | <i>Humicola</i>            | 0.6313 | positive |
| <i>Schizothecium</i> | <i>Trichoderma</i>         | 0.5931 | positive |
| <i>Schizothecium</i> | <i>Gibellulopsis</i>       | 0.5342 | positive |

---

---

|                          |                            |        |          |
|--------------------------|----------------------------|--------|----------|
| <i>Schizothecium</i>     | <i>Oidiodendron</i>        | 0.827  | positive |
| <i>Schizothecium</i>     | <i>Mycothermus</i>         | 0.7114 | positive |
| <i>Schizothecium</i>     | <i>Fusicolla</i>           | 0.5797 | positive |
| <i>Schizothecium</i>     | <i>Stachybotrys</i>        | 0.6701 | positive |
| <i>Schizothecium</i>     | <i>Ceratobasidium</i>      | 0.6464 | positive |
| <i>Schizothecium</i>     | <i>Mycoarthritis</i>       | 0.7424 | positive |
| <i>Schizothecium</i>     | <i>Tomentella</i>          | 0.5604 | positive |
| <i>Schizothecium</i>     | <i>Colletotrichum</i>      | 0.5427 | positive |
| <i>Archaeorhizomyces</i> | <i>Condenascus</i>         | 0.6618 | positive |
| <i>Archaeorhizomyces</i> | <i>Acremonium</i>          | 0.5029 | positive |
| <i>Archaeorhizomyces</i> | <i>Arthrinium</i>          | 0.5578 | negative |
| <i>Archaeorhizomyces</i> | <i>Achroceratosphaeria</i> | 0.5765 | positive |
| <i>Archaeorhizomyces</i> | <i>Humicola</i>            | 0.6529 | positive |
| <i>Archaeorhizomyces</i> | <i>Trichoderma</i>         | 0.7265 | positive |
| <i>Archaeorhizomyces</i> | <i>Leptobacillium</i>      | 0.6941 | positive |
| <i>Archaeorhizomyces</i> | <i>Arxiella</i>            | 0.5284 | positive |
| <i>Archaeorhizomyces</i> | <i>Gibellulopsis</i>       | 0.5647 | positive |
| <i>Archaeorhizomyces</i> | <i>Metarhizium</i>         | 0.6118 | positive |
| <i>Archaeorhizomyces</i> | <i>Oidiodendron</i>        | 0.6623 | positive |
| <i>Archaeorhizomyces</i> | <i>Cercospora</i>          | 0.5151 | positive |
| <i>Archaeorhizomyces</i> | <i>Fusicolla</i>           | 0.5896 | positive |
| <i>Archaeorhizomyces</i> | <i>Stachybotrys</i>        | 0.5634 | positive |
| <i>Archaeorhizomyces</i> | <i>Paraphoma</i>           | 0.5676 | positive |
| <i>Archaeorhizomyces</i> | <i>Ceratobasidium</i>      | 0.4978 | positive |
| <i>Archaeorhizomyces</i> | <i>Remersonia</i>          | 0.6088 | positive |
| <i>Archaeorhizomyces</i> | <i>Exophiala</i>           | 0.7021 | positive |
| <i>Archaeorhizomyces</i> | <i>Iodophanus</i>          | 0.5757 | positive |
| <i>Archaeorhizomyces</i> | <i>Submersisphaeria</i>    | 0.6061 | positive |
| <i>Archaeorhizomyces</i> | <i>Tomentella</i>          | 0.603  | positive |
| <i>Condenascus</i>       | <i>Acremonium</i>          | 0.7235 | positive |
| <i>Condenascus</i>       | <i>Arthrinium</i>          | 0.6284 | negative |
| <i>Condenascus</i>       | <i>Achroceratosphaeria</i> | 0.7559 | positive |
| <i>Condenascus</i>       | <i>Humicola</i>            | 0.9    | positive |
| <i>Condenascus</i>       | <i>Trichoderma</i>         | 0.8324 | positive |
| <i>Condenascus</i>       | <i>Leptobacillium</i>      | 0.5676 | positive |
| <i>Condenascus</i>       | <i>Arxiella</i>            | 0.7911 | positive |
| <i>Condenascus</i>       | <i>Gibellulopsis</i>       | 0.5735 | positive |
| <i>Condenascus</i>       | <i>Rhodotorula</i>         | 0.5269 | negative |
| <i>Condenascus</i>       | <i>Botryotrichum</i>       | 0.7206 | positive |
| <i>Condenascus</i>       | <i>Rhinoctadiella</i>      | 0.5796 | negative |
| <i>Condenascus</i>       | <i>Metarhizium</i>         | 0.6235 | positive |
| <i>Condenascus</i>       | <i>Candida</i>             | 0.6353 | positive |
| <i>Condenascus</i>       | <i>Lectera</i>             | 0.5529 | positive |
| <i>Condenascus</i>       | <i>Gymnoascus</i>          | 0.6845 | positive |

---

---

|                    |                            |        |          |
|--------------------|----------------------------|--------|----------|
| <i>Condenascus</i> | <i>Stolonocarpus</i>       | 0.7704 | positive |
| <i>Condenascus</i> | <i>Leohumicola</i>         | 0.6118 | positive |
| <i>Condenascus</i> | <i>Myrmecridium</i>        | 0.5794 | positive |
| <i>Condenascus</i> | <i>Clonostachys</i>        | 0.5941 | positive |
| <i>Condenascus</i> | <i>Lepiota</i>             | 0.7729 | positive |
| <i>Condenascus</i> | <i>Kazachstania</i>        | 0.5107 | positive |
| <i>Condenascus</i> | <i>Fusicolla</i>           | 0.6889 | positive |
| <i>Condenascus</i> | <i>Thermoascus</i>         | 0.5843 | positive |
| <i>Condenascus</i> | <i>Paraphoma</i>           | 0.5559 | positive |
| <i>Condenascus</i> | <i>Ceratobasidium</i>      | 0.5689 | positive |
| <i>Condenascus</i> | <i>Remersonia</i>          | 0.7235 | positive |
| <i>Condenascus</i> | <i>Xerochrysum</i>         | 0.5659 | positive |
| <i>Condenascus</i> | <i>Exophiala</i>           | 0.6991 | positive |
| <i>Condenascus</i> | <i>Tomentella</i>          | 0.6622 | positive |
| <i>Condenascus</i> | <i>Colletotrichum</i>      | 0.6829 | positive |
| <i>Acremonium</i>  | <i>Arthrimum</i>           | 0.596  | negative |
| <i>Acremonium</i>  | <i>Achroceratosphaeria</i> | 0.6794 | positive |
| <i>Acremonium</i>  | <i>Humicola</i>            | 0.7735 | positive |
| <i>Acremonium</i>  | <i>Trichoderma</i>         | 0.65   | positive |
| <i>Acremonium</i>  | <i>Leptobacillium</i>      | 0.6559 | positive |
| <i>Acremonium</i>  | <i>Arxiella</i>            | 0.5314 | positive |
| <i>Acremonium</i>  | <i>Rhinocladiella</i>      | 0.5435 | negative |
| <i>Acremonium</i>  | <i>Metarhizium</i>         | 0.8971 | positive |
| <i>Acremonium</i>  | <i>Candida</i>             | 0.7059 | positive |
| <i>Acremonium</i>  | <i>Lectera</i>             | 0.7353 | positive |
| <i>Acremonium</i>  | <i>Gymnoascus</i>          | 0.523  | positive |
| <i>Acremonium</i>  | <i>Stolonocarpus</i>       | 0.7171 | positive |
| <i>Acremonium</i>  | <i>Leohumicola</i>         | 0.7676 | positive |
| <i>Acremonium</i>  | <i>Myrmecridium</i>        | 0.7    | positive |
| <i>Acremonium</i>  | <i>Echria</i>              | 0.5382 | positive |
| <i>Acremonium</i>  | <i>Clonostachys</i>        | 0.6735 | positive |
| <i>Acremonium</i>  | <i>Lepiota</i>             | 0.6018 | positive |
| <i>Acremonium</i>  | <i>Tricholoma</i>          | 0.5754 | positive |
| <i>Acremonium</i>  | <i>Kazachstania</i>        | 0.5725 | positive |
| <i>Acremonium</i>  | <i>Fusicolla</i>           | 0.763  | positive |
| <i>Acremonium</i>  | <i>Thermoascus</i>         | 0.5592 | positive |
| <i>Acremonium</i>  | <i>Microdochium</i>        | 0.6941 | positive |
| <i>Acremonium</i>  | <i>Arthrographis</i>       | 0.5911 | positive |
| <i>Acremonium</i>  | <i>Paraphoma</i>           | 0.5294 | positive |
| <i>Acremonium</i>  | <i>Remersonia</i>          | 0.8029 | positive |
| <i>Acremonium</i>  | <i>Xerochrysum</i>         | 0.52   | positive |
| <i>Acremonium</i>  | <i>Exophiala</i>           | 0.5634 | positive |
| <i>Acremonium</i>  | <i>Tomentella</i>          | 0.7348 | positive |
| <i>Acremonium</i>  | <i>Colletotrichum</i>      | 0.7167 | positive |

---

---

|                            |                            |        |          |
|----------------------------|----------------------------|--------|----------|
| <i>Arthrinium</i>          | <i>Achroceratosphaeria</i> | 0.7226 | negative |
| <i>Arthrinium</i>          | <i>Humicola</i>            | 0.6858 | negative |
| <i>Arthrinium</i>          | <i>Trichoderma</i>         | 0.6431 | negative |
| <i>Arthrinium</i>          | <i>Arxiella</i>            | 0.5258 | negative |
| <i>Arthrinium</i>          | <i>Cystobasidium</i>       | 0.5133 | positive |
| <i>Arthrinium</i>          | <i>Metarhizium</i>         | 0.5018 | negative |
| <i>Arthrinium</i>          | <i>Stolonocarpus</i>       | 0.6019 | negative |
| <i>Arthrinium</i>          | <i>Lepiota</i>             | 0.4974 | negative |
| <i>Arthrinium</i>          | <i>Fusicolla</i>           | 0.811  | negative |
| <i>Arthrinium</i>          | <i>Stachybotrys</i>        | 0.5137 | negative |
| <i>Arthrinium</i>          | <i>Ceratobasidium</i>      | 0.6612 | negative |
| <i>Arthrinium</i>          | <i>Remersonia</i>          | 0.5592 | negative |
| <i>Arthrinium</i>          | <i>Mycoarthritis</i>       | 0.5049 | negative |
| <i>Arthrinium</i>          | <i>Iodophanus</i>          | 0.6805 | negative |
| <i>Arthrinium</i>          | <i>Colletotrichum</i>      | 0.5714 | negative |
| <i>Achroceratosphaeria</i> | <i>Humicola</i>            | 0.9176 | positive |
| <i>Achroceratosphaeria</i> | <i>Trichoderma</i>         | 0.8088 | positive |
| <i>Achroceratosphaeria</i> | <i>Leptobacillium</i>      | 0.6382 | positive |
| <i>Achroceratosphaeria</i> | <i>Arxiella</i>            | 0.824  | positive |
| <i>Achroceratosphaeria</i> | <i>Cystobasidium</i>       | 0.7167 | negative |
| <i>Achroceratosphaeria</i> | <i>Rhodotorula</i>         | 0.5269 | negative |
| <i>Achroceratosphaeria</i> | <i>Botryotrichum</i>       | 0.6147 | positive |
| <i>Achroceratosphaeria</i> | <i>Metarhizium</i>         | 0.6029 | positive |
| <i>Achroceratosphaeria</i> | <i>Candida</i>             | 0.5676 | positive |
| <i>Achroceratosphaeria</i> | <i>Curvularia</i>          | 0.5548 | negative |
| <i>Achroceratosphaeria</i> | <i>Oidiodendron</i>        | 0.5033 | positive |
| <i>Achroceratosphaeria</i> | <i>Gymnoascus</i>          | 0.7689 | positive |
| <i>Achroceratosphaeria</i> | <i>Stolonocarpus</i>       | 0.7689 | positive |
| <i>Achroceratosphaeria</i> | <i>Myrmecridium</i>        | 0.7118 | positive |
| <i>Achroceratosphaeria</i> | <i>Thermomyces</i>         | 0.5882 | positive |
| <i>Achroceratosphaeria</i> | <i>Mycothermus</i>         | 0.5988 | positive |
| <i>Achroceratosphaeria</i> | <i>Clonostachys</i>        | 0.5647 | positive |
| <i>Achroceratosphaeria</i> | <i>Lepiota</i>             | 0.8614 | positive |
| <i>Achroceratosphaeria</i> | <i>Kazachstania</i>        | 0.6755 | positive |
| <i>Achroceratosphaeria</i> | <i>Fusicolla</i>           | 0.6163 | positive |
| <i>Achroceratosphaeria</i> | <i>Stachybotrys</i>        | 0.7168 | positive |
| <i>Achroceratosphaeria</i> | <i>Thermoascus</i>         | 0.6313 | positive |
| <i>Achroceratosphaeria</i> | <i>Arthrographis</i>       | 0.6986 | positive |
| <i>Achroceratosphaeria</i> | <i>Ceratobasidium</i>      | 0.6548 | positive |
| <i>Achroceratosphaeria</i> | <i>Remersonia</i>          | 0.5765 | positive |
| <i>Achroceratosphaeria</i> | <i>Xerochrysum</i>         | 0.7556 | positive |
| <i>Achroceratosphaeria</i> | <i>Mycoarthritis</i>       | 0.6926 | positive |
| <i>Achroceratosphaeria</i> | <i>Exophiala</i>           | 0.7257 | positive |
| <i>Achroceratosphaeria</i> | <i>Tomentella</i>          | 0.7985 | positive |

---



---

|                            |                       |        |          |
|----------------------------|-----------------------|--------|----------|
| <i>Achroceratosphaeria</i> | <i>Colletotrichum</i> | 0.8477 | positive |
| <i>Hannaella</i>           | <i>Gibellulopsis</i>  | 0.5235 | positive |
| <i>Humicola</i>            | <i>Trichoderma</i>    | 0.8559 | positive |
| <i>Humicola</i>            | <i>Leptobacillium</i> | 0.6471 | positive |
| <i>Humicola</i>            | <i>Arxiella</i>       | 0.8329 | positive |
| <i>Humicola</i>            | <i>Cystobasidium</i>  | 0.6402 | negative |
| <i>Humicola</i>            | <i>Gibellulopsis</i>  | 0.5412 | positive |
| <i>Humicola</i>            | <i>Botryotrichum</i>  | 0.7147 | positive |
| <i>Humicola</i>            | <i>Rhinocladiella</i> | 0.5686 | negative |
| <i>Humicola</i>            | <i>Metarhizium</i>    | 0.6588 | positive |
| <i>Humicola</i>            | <i>Candida</i>        | 0.6559 | positive |
| <i>Humicola</i>            | <i>Lectera</i>        | 0.5    | positive |
| <i>Humicola</i>            | <i>Oidiodendron</i>   | 0.5283 | positive |
| <i>Humicola</i>            | <i>Gymnoascus</i>     | 0.6948 | positive |
| <i>Humicola</i>            | <i>Stolonocarpus</i>  | 0.8326 | positive |
| <i>Humicola</i>            | <i>Leohumicola</i>    | 0.5294 | positive |
| <i>Humicola</i>            | <i>Myrmecridium</i>   | 0.7    | positive |
| <i>Humicola</i>            | <i>Thermomyces</i>    | 0.5971 | positive |
| <i>Humicola</i>            | <i>Mycothermus</i>    | 0.5546 | positive |
| <i>Humicola</i>            | <i>Clonostachys</i>   | 0.5794 | positive |
| <i>Humicola</i>            | <i>Lepiota</i>        | 0.8171 | positive |
| <i>Humicola</i>            | <i>Kazachstania</i>   | 0.6137 | positive |
| <i>Humicola</i>            | <i>Fusicolla</i>      | 0.7215 | positive |
| <i>Humicola</i>            | <i>Stachybotrys</i>   | 0.5929 | positive |
| <i>Humicola</i>            | <i>Thermoascus</i>    | 0.6269 | positive |
| <i>Humicola</i>            | <i>Arthrographis</i>  | 0.6478 | positive |
| <i>Humicola</i>            | <i>Paraphoma</i>      | 0.5324 | positive |
| <i>Humicola</i>            | <i>Ceratobasidium</i> | 0.6519 | positive |
| <i>Humicola</i>            | <i>Remersonia</i>     | 0.6971 | positive |
| <i>Humicola</i>            | <i>Xerochrysum</i>    | 0.7348 | positive |
| <i>Humicola</i>            | <i>Mycoarthritis</i>  | 0.6717 | positive |
| <i>Humicola</i>            | <i>Exophiala</i>      | 0.7463 | positive |
| <i>Humicola</i>            | <i>Tomentella</i>     | 0.803  | positive |
| <i>Humicola</i>            | <i>Colletotrichum</i> | 0.8315 | positive |
| <i>Nigrospora</i>          | <i>Leohumicola</i>    | 0.5324 | positive |
| <i>Nigrospora</i>          | <i>Microdochium</i>   | 0.5529 | positive |
| <i>Trichoderma</i>         | <i>Leptobacillium</i> | 0.5824 | positive |
| <i>Trichoderma</i>         | <i>Arxiella</i>       | 0.7165 | positive |
| <i>Trichoderma</i>         | <i>Gibellulopsis</i>  | 0.6088 | positive |
| <i>Trichoderma</i>         | <i>Botryotrichum</i>  | 0.8706 | positive |
| <i>Trichoderma</i>         | <i>Metarhizium</i>    | 0.5059 | positive |
| <i>Trichoderma</i>         | <i>Oidiodendron</i>   | 0.5224 | positive |
| <i>Trichoderma</i>         | <i>Gymnoascus</i>     | 0.7763 | positive |
| <i>Trichoderma</i>         | <i>Stolonocarpus</i>  | 0.7526 | positive |

---

---

|                       |                         |        |          |
|-----------------------|-------------------------|--------|----------|
| <i>Trichoderma</i>    | <i>Cercospora</i>       | 0.5887 | positive |
| <i>Trichoderma</i>    | <i>Myrmecridium</i>     | 0.7382 | positive |
| <i>Trichoderma</i>    | <i>Mycothermus</i>      | 0.649  | positive |
| <i>Trichoderma</i>    | <i>Clonostachys</i>     | 0.6765 | positive |
| <i>Trichoderma</i>    | <i>Lepiota</i>          | 0.6785 | positive |
| <i>Trichoderma</i>    | <i>Kazachstania</i>     | 0.5666 | positive |
| <i>Trichoderma</i>    | <i>Fusicolla</i>        | 0.5496 | positive |
| <i>Trichoderma</i>    | <i>Stachybotrys</i>     | 0.6844 | positive |
| <i>Trichoderma</i>    | <i>Thermoascus</i>      | 0.6755 | positive |
| <i>Trichoderma</i>    | <i>Arthrographis</i>    | 0.5254 | positive |
| <i>Trichoderma</i>    | <i>Ceratobasidium</i>   | 0.8163 | positive |
| <i>Trichoderma</i>    | <i>Remersonia</i>       | 0.6588 | positive |
| <i>Trichoderma</i>    | <i>Xerochrysum</i>      | 0.563  | positive |
| <i>Trichoderma</i>    | <i>Mycoarthritis</i>    | 0.621  | positive |
| <i>Trichoderma</i>    | <i>Exophiala</i>        | 0.6637 | positive |
| <i>Trichoderma</i>    | <i>Iodophanus</i>       | 0.5216 | positive |
| <i>Trichoderma</i>    | <i>Tomentella</i>       | 0.7393 | positive |
| <i>Trichoderma</i>    | <i>Colletotrichum</i>   | 0.7535 | positive |
| <i>Leptobacillium</i> | <i>Arxiella</i>         | 0.7314 | positive |
| <i>Leptobacillium</i> | <i>Cystobasidium</i>    | 0.5107 | negative |
| <i>Leptobacillium</i> | <i>Metarhizium</i>      | 0.7    | positive |
| <i>Leptobacillium</i> | <i>Candida</i>          | 0.6912 | positive |
| <i>Leptobacillium</i> | <i>Curvularia</i>       | 0.5666 | negative |
| <i>Leptobacillium</i> | <i>Gymnoascus</i>       | 0.5289 | positive |
| <i>Leptobacillium</i> | <i>Stolonocarpus</i>    | 0.5837 | positive |
| <i>Leptobacillium</i> | <i>Cercospora</i>       | 0.5872 | positive |
| <i>Leptobacillium</i> | <i>Myrmecridium</i>     | 0.6176 | positive |
| <i>Leptobacillium</i> | <i>Wallemia</i>         | 0.5176 | positive |
| <i>Leptobacillium</i> | <i>Lepiota</i>          | 0.5251 | positive |
| <i>Leptobacillium</i> | <i>Tricholoma</i>       | 0.5563 | positive |
| <i>Leptobacillium</i> | <i>Fusicolla</i>        | 0.6341 | positive |
| <i>Leptobacillium</i> | <i>Thermoascus</i>      | 0.5416 | positive |
| <i>Leptobacillium</i> | <i>Arthrographis</i>    | 0.615  | positive |
| <i>Leptobacillium</i> | <i>Paraphoma</i>        | 0.7176 | positive |
| <i>Leptobacillium</i> | <i>Remersonia</i>       | 0.5824 | positive |
| <i>Leptobacillium</i> | <i>Exophiala</i>        | 0.5398 | positive |
| <i>Leptobacillium</i> | <i>Colletotrichum</i>   | 0.6343 | positive |
| <i>Arxiella</i>       | <i>Cystobasidium</i>    | 0.6797 | negative |
| <i>Arxiella</i>       | <i>Gibellulopsis</i>    | 0.5075 | positive |
| <i>Arxiella</i>       | <i>Rhodotorula</i>      | 0.6065 | negative |
| <i>Arxiella</i>       | <i>Botryotrichum</i>    | 0.6031 | positive |
| <i>Arxiella</i>       | <i>Pyrenochaetopsis</i> | 0.5732 | positive |
| <i>Arxiella</i>       | <i>Candida</i>          | 0.6747 | positive |
| <i>Arxiella</i>       | <i>Gymnoascus</i>       | 0.7339 | positive |

---

---

|                      |                         |        |          |
|----------------------|-------------------------|--------|----------|
| <i>Arxiella</i>      | <i>Stolonocarpus</i>    | 0.7143 | positive |
| <i>Arxiella</i>      | <i>Cercospora</i>       | 0.5497 | positive |
| <i>Arxiella</i>      | <i>Myrmecridium</i>     | 0.5583 | positive |
| <i>Arxiella</i>      | <i>Wallemia</i>         | 0.5075 | positive |
| <i>Arxiella</i>      | <i>Mycothermus</i>      | 0.6198 | positive |
| <i>Arxiella</i>      | <i>Lepiota</i>          | 0.8713 | positive |
| <i>Arxiella</i>      | <i>Fusicolla</i>        | 0.5534 | positive |
| <i>Arxiella</i>      | <i>Thermoascus</i>      | 0.5228 | positive |
| <i>Arxiella</i>      | <i>Arthrographis</i>    | 0.6545 | positive |
| <i>Arxiella</i>      | <i>Paraphoma</i>        | 0.5613 | positive |
| <i>Arxiella</i>      | <i>Ceratobasidium</i>   | 0.5459 | positive |
| <i>Arxiella</i>      | <i>Remersonia</i>       | 0.5075 | positive |
| <i>Arxiella</i>      | <i>Xerochrysum</i>      | 0.5504 | positive |
| <i>Arxiella</i>      | <i>Mycoarthritis</i>    | 0.6273 | positive |
| <i>Arxiella</i>      | <i>Exophiala</i>        | 0.6378 | positive |
| <i>Arxiella</i>      | <i>Tomentella</i>       | 0.4993 | positive |
| <i>Arxiella</i>      | <i>Colletotrichum</i>   | 0.7051 | positive |
| <i>Cystobasidium</i> | <i>Metarhizium</i>      | 0.5622 | negative |
| <i>Cystobasidium</i> | <i>Gymnoascus</i>       | 0.5916 | negative |
| <i>Cystobasidium</i> | <i>Lepiota</i>          | 0.6155 | negative |
| <i>Cystobasidium</i> | <i>Arthrographis</i>    | 0.5034 | negative |
| <i>Cystobasidium</i> | <i>Tomentella</i>       | 0.5367 | negative |
| <i>Cystobasidium</i> | <i>Colletotrichum</i>   | 0.592  | negative |
| <i>Gibellulopsis</i> | <i>Botryotrichum</i>    | 0.5588 | positive |
| <i>Gibellulopsis</i> | <i>Rhinochadiella</i>   | 0.5168 | negative |
| <i>Gibellulopsis</i> | <i>Oidiodendron</i>     | 0.543  | positive |
| <i>Gibellulopsis</i> | <i>Cercospora</i>       | 0.6034 | positive |
| <i>Gibellulopsis</i> | <i>Mycothermus</i>      | 0.59   | positive |
| <i>Gibellulopsis</i> | <i>Fusicolla</i>        | 0.6148 | positive |
| <i>Gibellulopsis</i> | <i>Ceratobasidium</i>   | 0.683  | positive |
| <i>Gibellulopsis</i> | <i>Remersonia</i>       | 0.6088 | positive |
| <i>Gibellulopsis</i> | <i>Mycoarthritis</i>    | 0.5314 | positive |
| <i>Rhodotorula</i>   | <i>Pyrenochaetopsis</i> | 0.5872 | negative |
| <i>Rhodotorula</i>   | <i>Candida</i>          | 0.5092 | negative |
| <i>Rhodotorula</i>   | <i>Lepiota</i>          | 0.6539 | negative |
| <i>Rhodotorula</i>   | <i>Fusicolla</i>        | 0.5589 | negative |
| <i>Rhodotorula</i>   | <i>Xerochrysum</i>      | 0.4982 | negative |
| <i>Botryotrichum</i> | <i>Rhinochadiella</i>   | 0.5089 | negative |
| <i>Botryotrichum</i> | <i>Thelebolus</i>       | 0.6196 | negative |
| <i>Botryotrichum</i> | <i>Gymnoascus</i>       | 0.7185 | positive |
| <i>Botryotrichum</i> | <i>Stolonocarpus</i>    | 0.7897 | positive |
| <i>Botryotrichum</i> | <i>Cercospora</i>       | 0.5445 | positive |
| <i>Botryotrichum</i> | <i>Myrmecridium</i>     | 0.7324 | positive |
| <i>Botryotrichum</i> | <i>Clonostachys</i>     | 0.6118 | positive |

---

---

|                         |                        |        |          |
|-------------------------|------------------------|--------|----------|
| <i>Botryotrichum</i>    | <i>Stachybotrys</i>    | 0.5103 | positive |
| <i>Botryotrichum</i>    | <i>Thermoascus</i>     | 0.652  | positive |
| <i>Botryotrichum</i>    | <i>Ceratobasidium</i>  | 0.7585 | positive |
| <i>Botryotrichum</i>    | <i>Remersonia</i>      | 0.5529 | positive |
| <i>Botryotrichum</i>    | <i>Xerochrysium</i>    | 0.6134 | positive |
| <i>Botryotrichum</i>    | <i>Tomentella</i>      | 0.56   | positive |
| <i>Botryotrichum</i>    | <i>Colletotrichum</i>  | 0.7403 | positive |
| <i>Pyrenochaetopsis</i> | <i>Candida</i>         | 0.7    | positive |
| <i>Pyrenochaetopsis</i> | <i>Lectera</i>         | 0.5265 | positive |
| <i>Pyrenochaetopsis</i> | <i>Lepiota</i>         | 0.5841 | positive |
| <i>Rhinocladiella</i>   | <i>Lectera</i>         | 0.5733 | negative |
| <i>Rhinocladiella</i>   | <i>Stolonocarpus</i>   | 0.5056 | negative |
| <i>Rhinocladiella</i>   | <i>Leohumicola</i>     | 0.5671 | negative |
| <i>Rhinocladiella</i>   | <i>Clonostachys</i>    | 0.5435 | negative |
| <i>Rhinocladiella</i>   | <i>Fusicolla</i>       | 0.6227 | negative |
| <i>Rhinocladiella</i>   | <i>Remersonia</i>      | 0.6362 | negative |
| <i>Thelebolus</i>       | <i>Gymnoascus</i>      | 0.5278 | negative |
| <i>Thelebolus</i>       | <i>Clonostachys</i>    | 0.6107 | negative |
| <i>Metarhizium</i>      | <i>Candida</i>         | 0.7382 | positive |
| <i>Metarhizium</i>      | <i>Curvularia</i>      | 0.5239 | negative |
| <i>Metarhizium</i>      | <i>Lectera</i>         | 0.7088 | positive |
| <i>Metarhizium</i>      | <i>Leohumicola</i>     | 0.5882 | positive |
| <i>Metarhizium</i>      | <i>Myrmecridium</i>    | 0.5176 | positive |
| <i>Metarhizium</i>      | <i>Echria</i>          | 0.6471 | positive |
| <i>Metarhizium</i>      | <i>Clonostachys</i>    | 0.5765 | positive |
| <i>Metarhizium</i>      | <i>Lepiota</i>         | 0.5133 | positive |
| <i>Metarhizium</i>      | <i>Tricholoma</i>      | 0.5563 | positive |
| <i>Metarhizium</i>      | <i>Kazachstania</i>    | 0.5121 | positive |
| <i>Metarhizium</i>      | <i>Fusicolla</i>       | 0.6563 | positive |
| <i>Metarhizium</i>      | <i>Thermoascus</i>     | 0.5224 | positive |
| <i>Metarhizium</i>      | <i>Microdochium</i>    | 0.6676 | positive |
| <i>Metarhizium</i>      | <i>Arthrographis</i>   | 0.5165 | positive |
| <i>Metarhizium</i>      | <i>Paraphoma</i>       | 0.6824 | positive |
| <i>Metarhizium</i>      | <i>Remersonia</i>      | 0.7706 | positive |
| <i>Metarhizium</i>      | <i>Exophiala</i>       | 0.6077 | positive |
| <i>Metarhizium</i>      | <i>Paramyrothecium</i> | 0.55   | positive |
| <i>Metarhizium</i>      | <i>Tomentella</i>      | 0.7111 | positive |
| <i>Metarhizium</i>      | <i>Colletotrichum</i>  | 0.5901 | positive |
| <i>Candida</i>          | <i>Lectera</i>         | 0.8618 | positive |
| <i>Candida</i>          | <i>Leohumicola</i>     | 0.7265 | positive |
| <i>Candida</i>          | <i>Echria</i>          | 0.5912 | positive |
| <i>Candida</i>          | <i>Clonostachys</i>    | 0.6059 | positive |
| <i>Candida</i>          | <i>Lepiota</i>         | 0.7286 | positive |
| <i>Candida</i>          | <i>Tricholoma</i>      | 0.6078 | positive |

---

---

|                      |                       |        |          |
|----------------------|-----------------------|--------|----------|
| <i>Candida</i>       | <i>Kazachstania</i>   | 0.5313 | positive |
| <i>Candida</i>       | <i>Fusicolla</i>      | 0.5408 | positive |
| <i>Candida</i>       | <i>Microdochium</i>   | 0.7412 | positive |
| <i>Candida</i>       | <i>Arthrographis</i>  | 0.6926 | positive |
| <i>Candida</i>       | <i>Paraphoma</i>      | 0.6618 | positive |
| <i>Candida</i>       | <i>Remersonia</i>     | 0.5735 | positive |
| <i>Candida</i>       | <i>Exophiala</i>      | 0.7699 | positive |
| <i>Candida</i>       | <i>Tomentella</i>     | 0.5719 | positive |
| <i>Curvularia</i>    | <i>Gymnoascus</i>     | 0.5263 | negative |
| <i>Curvularia</i>    | <i>Myrmecridium</i>   | 0.5504 | negative |
| <i>Curvularia</i>    | <i>Lepiota</i>        | 0.5491 | negative |
| <i>Curvularia</i>    | <i>Arthrographis</i>  | 0.6289 | negative |
| <i>Epicoccum</i>     | <i>Tricholoma</i>     | 0.5121 | negative |
| <i>Lectera</i>       | <i>Leohumicola</i>    | 0.8529 | positive |
| <i>Lectera</i>       | <i>Echria</i>         | 0.7794 | positive |
| <i>Lectera</i>       | <i>Clonostachys</i>   | 0.7265 | positive |
| <i>Lectera</i>       | <i>Tricholoma</i>     | 0.5887 | positive |
| <i>Lectera</i>       | <i>Microdochium</i>   | 0.8588 | positive |
| <i>Lectera</i>       | <i>Arthrographis</i>  | 0.5135 | positive |
| <i>Lectera</i>       | <i>Remersonia</i>     | 0.6088 | positive |
| <i>Lectera</i>       | <i>Exophiala</i>      | 0.6401 | positive |
| <i>Lectera</i>       | <i>Tomentella</i>     | 0.5615 | positive |
| <i>Oidiodendron</i>  | <i>Cercospora</i>     | 0.525  | positive |
| <i>Oidiodendron</i>  | <i>Mycothermus</i>    | 0.7793 | positive |
| <i>Oidiodendron</i>  | <i>Stachybotrys</i>   | 0.6554 | positive |
| <i>Oidiodendron</i>  | <i>Mycoarthritis</i>  | 0.5751 | positive |
| <i>Oidiodendron</i>  | <i>Exophiala</i>      | 0.6406 | positive |
| <i>Oidiodendron</i>  | <i>Tomentella</i>     | 0.5567 | positive |
| <i>Gymnoascus</i>    | <i>Stolonocarpus</i>  | 0.8261 | positive |
| <i>Gymnoascus</i>    | <i>Myrmecridium</i>   | 0.7941 | positive |
| <i>Gymnoascus</i>    | <i>Clonostachys</i>   | 0.6371 | positive |
| <i>Gymnoascus</i>    | <i>Lepiota</i>        | 0.7177 | positive |
| <i>Gymnoascus</i>    | <i>Kazachstania</i>   | 0.5315 | positive |
| <i>Gymnoascus</i>    | <i>Thermoascus</i>    | 0.7658 | positive |
| <i>Gymnoascus</i>    | <i>Arthrographis</i>  | 0.6376 | positive |
| <i>Gymnoascus</i>    | <i>Ceratobasidium</i> | 0.5351 | positive |
| <i>Gymnoascus</i>    | <i>Exophiala</i>      | 0.4993 | positive |
| <i>Gymnoascus</i>    | <i>Tomentella</i>     | 0.5948 | positive |
| <i>Gymnoascus</i>    | <i>Colletotrichum</i> | 0.8021 | positive |
| <i>Stolonocarpus</i> | <i>Leohumicola</i>    | 0.5526 | positive |
| <i>Stolonocarpus</i> | <i>Myrmecridium</i>   | 0.8311 | positive |
| <i>Stolonocarpus</i> | <i>Thermomyces</i>    | 0.5022 | positive |
| <i>Stolonocarpus</i> | <i>Clonostachys</i>   | 0.5748 | positive |
| <i>Stolonocarpus</i> | <i>Lepiota</i>        | 0.6687 | positive |

---

---

|                      |                       |        |          |
|----------------------|-----------------------|--------|----------|
| <i>Stolonocarpus</i> | <i>Fusicolla</i>      | 0.6119 | positive |
| <i>Stolonocarpus</i> | <i>Thermoascus</i>    | 0.6516 | positive |
| <i>Stolonocarpus</i> | <i>Arthrographis</i>  | 0.6466 | positive |
| <i>Stolonocarpus</i> | <i>Ceratobasidium</i> | 0.5985 | positive |
| <i>Stolonocarpus</i> | <i>Remersonia</i>     | 0.5956 | positive |
| <i>Stolonocarpus</i> | <i>Xerochrysium</i>   | 0.5963 | positive |
| <i>Stolonocarpus</i> | <i>Tomentella</i>     | 0.5851 | positive |
| <i>Stolonocarpus</i> | <i>Colletotrichum</i> | 0.8658 | positive |
| <i>Leohumicola</i>   | <i>Myrmecridium</i>   | 0.5618 | positive |
| <i>Leohumicola</i>   | <i>Echria</i>         | 0.5882 | positive |
| <i>Leohumicola</i>   | <i>Clonostachys</i>   | 0.6324 | positive |
| <i>Leohumicola</i>   | <i>Tricholoma</i>     | 0.6387 | positive |
| <i>Leohumicola</i>   | <i>Fusicolla</i>      | 0.563  | positive |
| <i>Leohumicola</i>   | <i>Microdochium</i>   | 0.8118 | positive |
| <i>Leohumicola</i>   | <i>Remersonia</i>     | 0.5529 | positive |
| <i>Leohumicola</i>   | <i>Exophiala</i>      | 0.5044 | positive |
| <i>Cercospora</i>    | <i>Mycothermus</i>    | 0.7469 | positive |
| <i>Cercospora</i>    | <i>Arthrographis</i>  | 0.5094 | positive |
| <i>Cercospora</i>    | <i>Ceratobasidium</i> | 0.5159 | positive |
| <i>Cercospora</i>    | <i>Mycoarthritis</i>  | 0.5258 | positive |
| <i>Myrmecridium</i>  | <i>Thermomyces</i>    | 0.5118 | positive |
| <i>Myrmecridium</i>  | <i>Clonostachys</i>   | 0.7529 | positive |
| <i>Myrmecridium</i>  | <i>Lepiota</i>        | 0.5752 | positive |
| <i>Myrmecridium</i>  | <i>Kazachstania</i>   | 0.5975 | positive |
| <i>Myrmecridium</i>  | <i>Thermoascus</i>    | 0.8079 | positive |
| <i>Myrmecridium</i>  | <i>Arthrographis</i>  | 0.7941 | positive |
| <i>Myrmecridium</i>  | <i>Ceratobasidium</i> | 0.5052 | positive |
| <i>Myrmecridium</i>  | <i>Xerochrysium</i>   | 0.5867 | positive |
| <i>Myrmecridium</i>  | <i>Exophiala</i>      | 0.5133 | positive |
| <i>Myrmecridium</i>  | <i>Tomentella</i>     | 0.6993 | positive |
| <i>Myrmecridium</i>  | <i>Colletotrichum</i> | 0.8197 | positive |
| <i>Thermomyces</i>   | <i>Lepiota</i>        | 0.5162 | positive |
| <i>Thermomyces</i>   | <i>Arthrographis</i>  | 0.5314 | positive |
| <i>Thermomyces</i>   | <i>Xerochrysium</i>   | 0.6519 | positive |
| <i>Thermomyces</i>   | <i>Tomentella</i>     | 0.6282 | positive |
| <i>Thermomyces</i>   | <i>Colletotrichum</i> | 0.5327 | positive |
| <i>Wallemia</i>      | <i>Paraphoma</i>      | 0.7235 | positive |
| <i>Echria</i>        | <i>Tricholoma</i>     | 0.5269 | positive |
| <i>Echria</i>        | <i>Microdochium</i>   | 0.8412 | positive |
| <i>Echria</i>        | <i>Paraphoma</i>      | 0.5    | positive |
| <i>Echria</i>        | <i>Remersonia</i>     | 0.5147 | positive |
| <i>Mycothermus</i>   | <i>Lepiota</i>        | 0.5976 | positive |
| <i>Mycothermus</i>   | <i>Kazachstania</i>   | 0.6317 | positive |
| <i>Mycothermus</i>   | <i>Stachybotrys</i>   | 0.6716 | positive |

---

---

|                     |                       |        |          |
|---------------------|-----------------------|--------|----------|
| <i>Mycothermus</i>  | <i>Arthrographis</i>  | 0.536  | positive |
| <i>Mycothermus</i>  | <i>Ceratobasidium</i> | 0.5721 | positive |
| <i>Mycothermus</i>  | <i>Mycoarthritis</i>  | 0.7396 | positive |
| <i>Mycothermus</i>  | <i>Exophiala</i>      | 0.6154 | positive |
| <i>Mycothermus</i>  | <i>Tomentella</i>     | 0.5602 | positive |
| <i>Clonostachys</i> | <i>Lepiota</i>        | 0.5664 | positive |
| <i>Clonostachys</i> | <i>Kazachstania</i>   | 0.5445 | positive |
| <i>Clonostachys</i> | <i>Thermoascus</i>    | 0.5666 | positive |
| <i>Clonostachys</i> | <i>Arthrographis</i>  | 0.6956 | positive |
| <i>Clonostachys</i> | <i>Remersonia</i>     | 0.7029 | positive |
| <i>Clonostachys</i> | <i>Xerochrysum</i>    | 0.5185 | positive |
| <i>Clonostachys</i> | <i>Exophiala</i>      | 0.5546 | positive |
| <i>Clonostachys</i> | <i>Tomentella</i>     | 0.6993 | positive |
| <i>Clonostachys</i> | <i>Colletotrichum</i> | 0.5548 | positive |
| <i>Lepiota</i>      | <i>Kazachstania</i>   | 0.6037 | positive |
| <i>Lepiota</i>      | <i>Fusicolla</i>      | 0.5007 | positive |
| <i>Lepiota</i>      | <i>Arthrographis</i>  | 0.7276 | positive |
| <i>Lepiota</i>      | <i>Ceratobasidium</i> | 0.5126 | positive |
| <i>Lepiota</i>      | <i>Xerochrysum</i>    | 0.6137 | positive |
| <i>Lepiota</i>      | <i>Mycoarthritis</i>  | 0.6168 | positive |
| <i>Lepiota</i>      | <i>Exophiala</i>      | 0.7574 | positive |
| <i>Lepiota</i>      | <i>Tomentella</i>     | 0.6211 | positive |
| <i>Lepiota</i>      | <i>Colletotrichum</i> | 0.6214 | positive |
| <i>Tricholoma</i>   | <i>Kazachstania</i>   | 0.7489 | positive |
| <i>Tricholoma</i>   | <i>Thermoascus</i>    | 0.5545 | positive |
| <i>Tricholoma</i>   | <i>Microdochium</i>   | 0.5931 | positive |
| <i>Tricholoma</i>   | <i>Arthrographis</i>  | 0.5169 | positive |
| <i>Tricholoma</i>   | <i>Exophiala</i>      | 0.5771 | positive |
| <i>Tricholoma</i>   | <i>Tomentella</i>     | 0.5389 | positive |
| <i>Kazachstania</i> | <i>Stachybotrys</i>   | 0.6199 | positive |
| <i>Kazachstania</i> | <i>Thermoascus</i>    | 0.7135 | positive |
| <i>Kazachstania</i> | <i>Arthrographis</i>  | 0.714  | positive |
| <i>Kazachstania</i> | <i>Remersonia</i>     | 0.4989 | positive |
| <i>Kazachstania</i> | <i>Xerochrysum</i>    | 0.6368 | positive |
| <i>Kazachstania</i> | <i>Exophiala</i>      | 0.6908 | positive |
| <i>Kazachstania</i> | <i>Tomentella</i>     | 0.7858 | positive |
| <i>Kazachstania</i> | <i>Colletotrichum</i> | 0.6222 | positive |
| <i>Fusicolla</i>    | <i>Paraphoma</i>      | 0.5408 | positive |
| <i>Fusicolla</i>    | <i>Ceratobasidium</i> | 0.5254 | positive |
| <i>Fusicolla</i>    | <i>Remersonia</i>     | 0.6726 | positive |
| <i>Fusicolla</i>    | <i>Iodophanus</i>     | 0.5508 | positive |
| <i>Fusicolla</i>    | <i>Colletotrichum</i> | 0.5404 | positive |
| <i>Stachybotrys</i> | <i>Ceratobasidium</i> | 0.7251 | positive |
| <i>Stachybotrys</i> | <i>Xerochrysum</i>    | 0.575  | positive |

---

---

|                       |                        |        |          |
|-----------------------|------------------------|--------|----------|
| <i>Stachybotrys</i>   | <i>Mycoarthritis</i>   | 0.6827 | positive |
| <i>Stachybotrys</i>   | <i>Exophiala</i>       | 0.6391 | positive |
| <i>Stachybotrys</i>   | <i>Tomentella</i>      | 0.6315 | positive |
| <i>Stachybotrys</i>   | <i>Colletotrichum</i>  | 0.4989 | positive |
| <i>Thermoascus</i>    | <i>Arthrographis</i>   | 0.6184 | positive |
| <i>Thermoascus</i>    | <i>Xerochrysium</i>    | 0.5145 | positive |
| <i>Thermoascus</i>    | <i>Exophiala</i>       | 0.5816 | positive |
| <i>Thermoascus</i>    | <i>Tomentella</i>      | 0.7472 | positive |
| <i>Thermoascus</i>    | <i>Colletotrichum</i>  | 0.8137 | positive |
| <i>Microdochium</i>   | <i>Remersonia</i>      | 0.5529 | positive |
| <i>Arthrographis</i>  | <i>Xerochrysium</i>    | 0.6496 | positive |
| <i>Arthrographis</i>  | <i>Mycoarthritis</i>   | 0.5364 | positive |
| <i>Arthrographis</i>  | <i>Exophiala</i>       | 0.5929 | positive |
| <i>Arthrographis</i>  | <i>Tomentella</i>      | 0.6617 | positive |
| <i>Arthrographis</i>  | <i>Colletotrichum</i>  | 0.6513 | positive |
| <i>Paraphoma</i>      | <i>Coprinellus</i>     | 0.4985 | positive |
| <i>Paraphoma</i>      | <i>Paramyrothecium</i> | 0.5    | positive |
| <i>Ceratobasidium</i> | <i>Mycoarthritis</i>   | 0.7399 | positive |
| <i>Ceratobasidium</i> | <i>Colletotrichum</i>  | 0.5167 | positive |
| <i>Remersonia</i>     | <i>Xerochrysium</i>    | 0.5185 | positive |
| <i>Remersonia</i>     | <i>Tomentella</i>      | 0.6711 | positive |
| <i>Remersonia</i>     | <i>Colletotrichum</i>  | 0.6034 | positive |
| <i>Xerochrysium</i>   | <i>Mycoarthritis</i>   | 0.5188 | positive |
| <i>Xerochrysium</i>   | <i>Exophiala</i>       | 0.5201 | positive |
| <i>Xerochrysium</i>   | <i>Tomentella</i>      | 0.744  | positive |
| <i>Xerochrysium</i>   | <i>Colletotrichum</i>  | 0.7391 | positive |
| <i>Exophiala</i>      | <i>Tomentella</i>      | 0.7846 | positive |
| <i>Exophiala</i>      | <i>Colletotrichum</i>  | 0.4989 | positive |
| <i>Tomentella</i>     | <i>Colletotrichum</i>  | 0.765  | positive |

---
